1

2

3

## 4 **The molecular foundation of proprioceptor muscle-type identity**

5

6

7 Stephan Dietrich<sup>1</sup>, Carlos Company<sup>2</sup>, Kun Song<sup>3</sup>, Elijah David Lowenstein<sup>4,5</sup>, Levin

8 Riedel<sup>1</sup>, Carmen Birchmeier<sup>4,5</sup>, Gaetano Gargiulo<sup>2</sup>, and Niccolò Zampieri<sup>1\*</sup>

9

10

11 <sup>1</sup>Laboratory of Development and Function of Neural Circuits, Max-Delbrück-Center

12 for Molecular Medicine; Robert-Rössle-Str. 10, 13125 Berlin, Germany.

13 <sup>2</sup>Laboratory of Molecular Oncology, Max-Delbrück-Center for Molecular Medicine;

14 Robert-Rössle-Str. 10, 13125 Berlin, Germany.

15 <sup>3</sup>Brain Research Center and Department of Biology, School of Life Sciences,

16 Southern University of Science and Technology; Shenzhen 518055, Guangdong,

17 China.

18 <sup>4</sup>Laboratory of Developmental Biology/Signal Transduction, Max-Delbrück-Center

19 for Molecular Medicine; Robert-Rössle-Str. 10, 13125 Berlin, Germany.

20 <sup>5</sup>Neurowissenschaftliches Forschungszentrum, NeuroCure Cluster of Excellence,

21 Charité; Charitéplatz 1, 10117 Berlin, Germany

22

23

24 \*Corresponding author: [niccolo.zampieri@mdc-berlin.de](mailto:niccolo.zampieri@mdc-berlin.de)

25 **Abstract**

26           The precise execution of coordinated movements depends on proprioception,  
27 the sense of body position in space. However, the molecular underpinnings of  
28 proprioceptive neuron subtype identities are not clear yet. In this study, we searched for  
29 molecular correlates of proprioceptor subtypes defined according to the identity of the  
30 muscle they innervate. We identified and validated signatures for subtypes monitoring  
31 the activity of back, abdominal, and hindlimb muscles. We found that proprioceptor  
32 muscle identity is acquired early in development and comprise programs controlling  
33 wiring specificity. Altogether this work paves the way for defining the mechanisms  
34 underlying the development of proprioceptor subtypes to the single muscle level and  
35 dissect their contributions to motor control.

## 36 **Introduction**

37           Proprioception, the sense of body position in space, is critical for the generation  
38 of coordinated movements and reflexive actions. The primary source of proprioceptive  
39 information is represented by sensory neurons in the dorsal root ganglia (DRG), whose  
40 afferents innervate specialized mechanoreceptive organs detecting muscle stretch and  
41 tension (Proske and Gandevia, 2012). Proprioceptive sensory neurons can be  
42 anatomically and functionally divided on the basis of the identity of the muscle and  
43 receptor organ they innervate. First, during early development, proprioceptors innervate  
44 muscles and in order to precisely adjust motor output according to the biomechanical  
45 properties of their targets wire with neural circuits in the central nervous system (CNS)  
46 with exquisite specificity (Balaskas et al., 2020; Meltzer et al., 2021). In addition, at a  
47 receptor level, proprioceptors can be further distinguished into three subtypes - Ia, Ib,  
48 and II - by their selective contribution to either muscle spindles (MS; Ia and II) or Golgi  
49 tendon organs (GTO; Ib) (Zampieri and de Nooij, 2021). Most notably, Ia sensory  
50 afferents make monosynaptic connections to motor neurons controlling the activity of  
51 the same muscle, as well as synergist muscle groups, while avoiding motor neurons  
52 controlling the function of antagonist muscles, thus providing the anatomical substrate  
53 for the stretch reflex (Eccles et al., 1957; Mears and Frank, 1997). These precise  
54 patterns of connectivity are conserved in all limbed vertebrates and their assembly  
55 precedes the emergence of neural activity (Mendelsohn et al., 2015; Mendelson and  
56 Frank, 1991), implying that proprioceptive neurons are endowed from early  
57 developmental stages with molecular programs controlling critical features of their  
58 muscle-type identity, such as central and peripheral target specificity (Poliak et al.,  
59 2016; Shin et al., 2020). However, these determinants are still largely unknown, thus  
60 hindering efforts to define the mechanisms underlying the development of

61 proprioceptive sensory neuron subtypes, the wiring of spinal sensorimotor circuits, and  
62 the contribution of muscle-specific proprioceptive feedback to motor control.

63 Single-cell transcriptomic efforts have revealed remarkable diversity among the  
64 major types of somatosensory neurons, while proprioceptors, despite their evident  
65 functional heterogeneity, seemed to represent a relatively more homogenous population  
66 (Chiu et al., 2014; Sharma et al., 2020; Usoskin et al., 2015). Recent studies aimed at  
67 characterizing the molecular nature of group Ia, Ib, and II neurons have revealed that  
68 signatures for receptor subtypes emerge late during development and are consolidated  
69 at postnatal stages (Oliver et al., 2021; Wu et al., 2021). However, the molecular basis  
70 of proprioceptor muscle-type identity remains elusive and so far only few markers for  
71 muscles in the distal hindlimb compartment have been identified (Poliak et al., 2016).

72 In this study, we used a single-cell transcriptomic approach that takes advantage  
73 of the somatotopic organization of proprioceptor muscle innervation to reveal the  
74 molecular profiles of cardinal muscle identities - epaxial and hypaxial - defined by  
75 peripheral connectivity to back and abdominal muscle groups at thoracic level, and  
76 lower back and hindlimb muscles at lumbar level. Our data show that muscle-type  
77 identity is acquired and consolidated during embryonic development and precedes the  
78 emergence of receptor character. In addition, we found that the identified molecular  
79 signatures comprise programs controlling defining features of proprioceptor muscle  
80 character, such as the specificity of muscle connectivity. In particular, differential  
81 expression of axon guidance molecules of the ephrin-A/EphA family discriminates  
82 epaxial and hypaxial muscle identities and elimination of ephrin-A5 function erodes the  
83 specificity of peripheral connectivity. Altogether, this study reveals that muscle-type  
84 identity is a fundamental aspect of proprioceptor subtype differentiation that is acquired

85 during early development and includes molecular programs involved in the control of  
86 muscle target specificity.

## 87 **Results**

### 88 *Transcriptome analysis at e15.5 reveals distinct proprioceptive clusters*

89 In order to identify molecular correlates of proprioceptive sensory neurons  
90 (pSN) muscle identity we used transcriptome analysis of neurons isolated from thoracic  
91 and lumbar DRG at embryonic day (e) 15.5 At this stage proprioceptors have just  
92 reached muscle targets in the periphery and their central afferents are progressing  
93 toward synaptic partners in the ventral spinal cord (Extended Data Fig. 1a) (Zampieri  
94 and de Nooij, 2021). In addition, neurons collected from different segmental levels are  
95 predicted to reveal traits of epaxial and hypaxial pSN muscle identities, as the cell  
96 bodies of neurons innervating back and abdominal muscle groups are found in thoracic  
97 DRG, while the ones innervating lower back and hindlimb muscle groups in lumbar  
98 ones (Fig. 1a).

99 We took advantage of parvalbumin expression in proprioceptors and a small  
100 subset of cutaneous mechanoreceptors (de Nooij et al., 2013) to isolate 960 neurons -  
101 480 from thoracic (T) levels 1 to 12 and 480 from lumbar (L) levels 1 to 5 - via  
102 fluorescence-activated cell sorting after dissociation of DRG from a BAC mouse line  
103 expressing tdTomato under the control of the parvalbumin promoter ( $Pv^{tdTom}$ ) (Kaiser  
104 et al., 2016) and processed them using the CEL-Seq2 protocol (Extended Data Fig. 1b  
105 and 1c) (Hashimshony et al., 2016). 519 neurons passed quality controls (see methods  
106 for details) and were found distributed into five molecularly distinct clusters (Fig. 1b  
107 and Extended Data Fig. 1d-f). Transcriptome analysis indicated that neurons in cluster  
108 (C) 1 represent proprioceptors, as they express general markers of proprioceptive  
109 identity ( $Pv$ ,  $Runx3$ ,  $Etv1$ , and  $Ntrk3$ ). C2-C4 neurons present a signature consistent  
110 with mechanoreceptor identity ( $Maf^+$  and  $Ntrk2^+$ ), with C3 neurons consisting of a  
111 postmitotic subset ( $Isl1^+$  and  $Avil^+$ ) while C2 and C4 are characterized by proliferation

112 markers (*Mki67*<sup>+</sup>, *Mcm2*<sup>+</sup>, and *Pcna*<sup>+</sup>). Finally, C5 represents neurons contaminated  
113 with glial transcripts (*Mpz*<sup>+</sup> and *ApoE*<sup>+</sup>; Fig. 1c and Extended Data Fig. 1g) (Lallemend  
114 and Ernfors, 2012).

115 Next, to highlight differences between proprioceptors we re-clustered C1  
116 neurons and obtained seven subsets (pC1-pC7; Fig. 1d and Extended Data Fig. 1h). In  
117 order to test whether anatomical provenance could point to proprioceptor muscle  
118 identities, we assigned anatomical origin to each cell. We found that neurons in pC2,  
119 pC4, pC5, and pC7 mainly originated from lumbar DRG and therefore could represent  
120 pSN connected to hindlimb muscles or the small subset of back muscles found at  
121 lumbar levels (lower back and tail muscles), while pC1, pC3, and pC6 present  
122 significant contribution from thoracic levels, where proprioceptors innervating back  
123 and abdominal muscles are located (Fig. 1a, e, and f) (Brink and Pfaff, 1980). We  
124 confirmed thoracic and lumbar origin at a transcriptional level by evaluating expression  
125 of *Hoxc10*, a gene defining lumbar identity (Philippidou and Dasen, 2013), and found  
126 that it closely recapitulated the anatomical assignment (Extended Data Fig. 1i). Next,  
127 we performed differential gene expression analysis and revealed distinct molecular  
128 signatures for each of these clusters (Fig. 1g). Surprisingly, we found that *Trpv1* is  
129 selectively enriched in neurons found in pC6 (Extended Data Fig. 1j). *Trpv1* is a well-  
130 known marker of nociceptive/thermosensitive neurons and therefore is not expected to  
131 be expressed in proprioceptors (Mishra et al., 2011). Nevertheless, we confirmed the  
132 presence of *Pv*<sup>+</sup>; *Runx3*<sup>+</sup>; *Trpv1*<sup>+</sup> DRG sensory neurons in e15.5 embryos, representing  
133 at this stage ~ 5% of all proprioceptors, both at thoracic and lumbar levels (Fig. 1h and  
134 i).

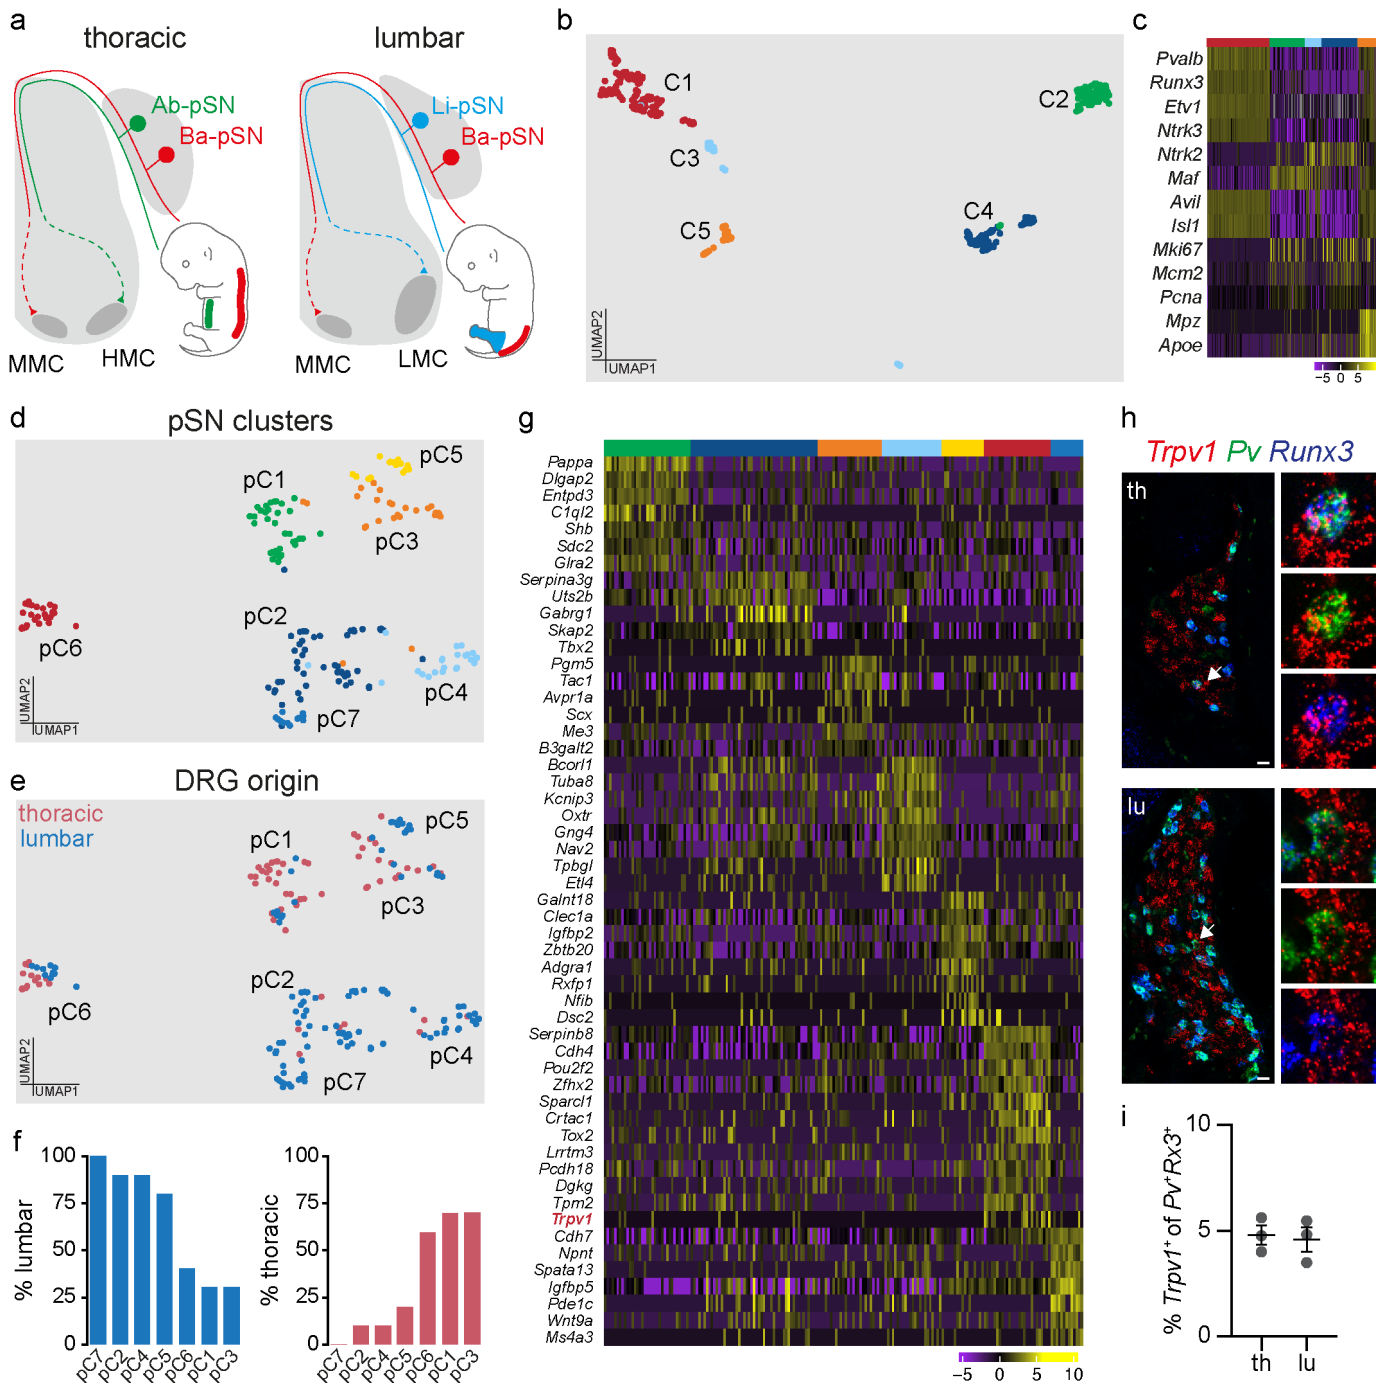

**Fig. 1. Single-cell transcriptome analysis of thoracic and lumbar proprioceptors at e15.5.** **a)** Schematic illustrating central and peripheral connectivity of e15.5 proprioceptors at thoracic (left) and lumbar (right) spinal levels. Ab-pSN, abdominal muscles-connecting proprioceptors; Ba-pSN, back muscles-connecting proprioceptors; Li-pSN, hindlimb muscles-connecting proprioceptors; MMC, median motor column; HMC, hypaxial motor column; LMC, lateral motor column. **b)** UMAP visualization of tdTomato<sup>+</sup> neuron clusters from *Pv<sup>tdTomato</sup>* embryos at e15.5. **c)** Gene expression analysis (logcounts) of proprioceptors (*Pv*, *Runx3*, *Etv1*, *Ntrk3*), mechanoreceptors (*Ntrk2*, *Maf*), postmitotic neurons (*Avil*, *Isl1*), proliferating neurons (*Mki67*, *Mcm2*, *Pcna*) and glial (*Mpz*, *Apoe*) markers. **d)** UMAP visualization of proprioceptor clusters identified from analysis of C1. **e)** UMAP visualization of proprioceptor clusters color-coded according to the thoracic (red) and lumbar (blue) origin of the cells. **f)** Percentage of proprioceptors originating from lumbar (left) and thoracic (right) DRG in different proprioceptor clusters. **g)** Differential gene expression analysis (logcounts) in proprioceptive clusters (pC1, green; pC2, dark blue; pC3, orange; pC4, light blue; pC5, yellow; pC6, red; pC7; blue). **h)** Representative single molecule fluorescent *in situ* hybridization (smFISH) images of thoracic (top) and lumbar (bottom) e15.5 DRG sections showing proprioceptors (*Runx3*<sup>+</sup>; *Pv*<sup>+</sup>) expressing *Trpv1*. Scale bar: 25  $\mu$ m. **i)** Percentage of proprioceptors (*Runx3*<sup>+</sup>; *Pv*<sup>+</sup>) expressing *Trpv1* in thoracic and lumbar DRG at e15.5 (mean  $\pm$  SEM, n = 3).



136 ***Embryonic expression of Trpv1 defines a subset of proprioceptors connected to back***  
137 ***muscles***

138 Next, to verify whether *Trpv1* expression in embryonic proprioceptors marks a  
139 discrete neuronal subtype we took advantage of mouse lines driving expression of Cre  
140 and Flp recombinases under control of the *Trpv1* (*Trpv1<sup>Cre</sup>*) (Cavanaugh et al., 2011)  
141 and parvalbumin (*Pv<sup>Flp</sup>*) (Madisen et al., 2010) promoters to label neurons with an  
142 intersectional tdTomato reporter allele (*Trpv1; Pv; tdT, Ai65*) (Madisen et al., 2015).

143 Anatomical analysis of postnatal day (p) 7 spinal cords, DRG, and muscles from  
144 *Trpv1; Pv; tdT* mice revealed a well-defined subset of sensory neurons. In the spinal  
145 cord, we found labeling of central afferents targeting and making vGluT1<sup>+</sup> synaptic  
146 contacts with ChAT<sup>+</sup> motor neurons in the median motor column (MMC), both at  
147 thoracic and lumbar levels, which are known to selectively innervate back and lower  
148 back/tail muscles (Fig. 2a, b, Extended Data Fig. 2b and Supplemental Videos 1 and  
149 2). In contrast, limb-projecting motor neurons in the lateral motor column (LMC) or  
150 abdomen-projecting motor neurons in the hypaxial motor column (HMC) received  
151 little, if any, input from *Trpv1; Pv; tdT* axons (Fig. 2a, 2b and Supplemental Video 1)  
152 (Jessell, 2000). In agreement with selective central innervation of neurons in the MMC,  
153 which is the only motor neuron column present at all rostral-caudal spinal levels, we  
154 observed labeling of a subset of parvalbumin<sup>+</sup> neurons in cervical, thoracic, and lumbar  
155 DRG (Fig. 2c-e, and Extended Data Fig. 2c). In the periphery, we found labeling of  
156 type Ia, Ib, and II receptors in back but not abdominal muscles (Fig. 2f and Extended  
157 Data Fig. 2a). Finally, in order to test the overall specificity of lineage tracing in *Trpv1;*  
158 *Pv; tdT* mice, we analyzed reporter expression in the brain. We did not find any labeling  
159 besides from axons projecting to the dorsal column nuclei of the brainstem that are

160 known to receive direct innervation from proprioceptive sensory neurons (Extended

161 Data Fig. 2e).

162

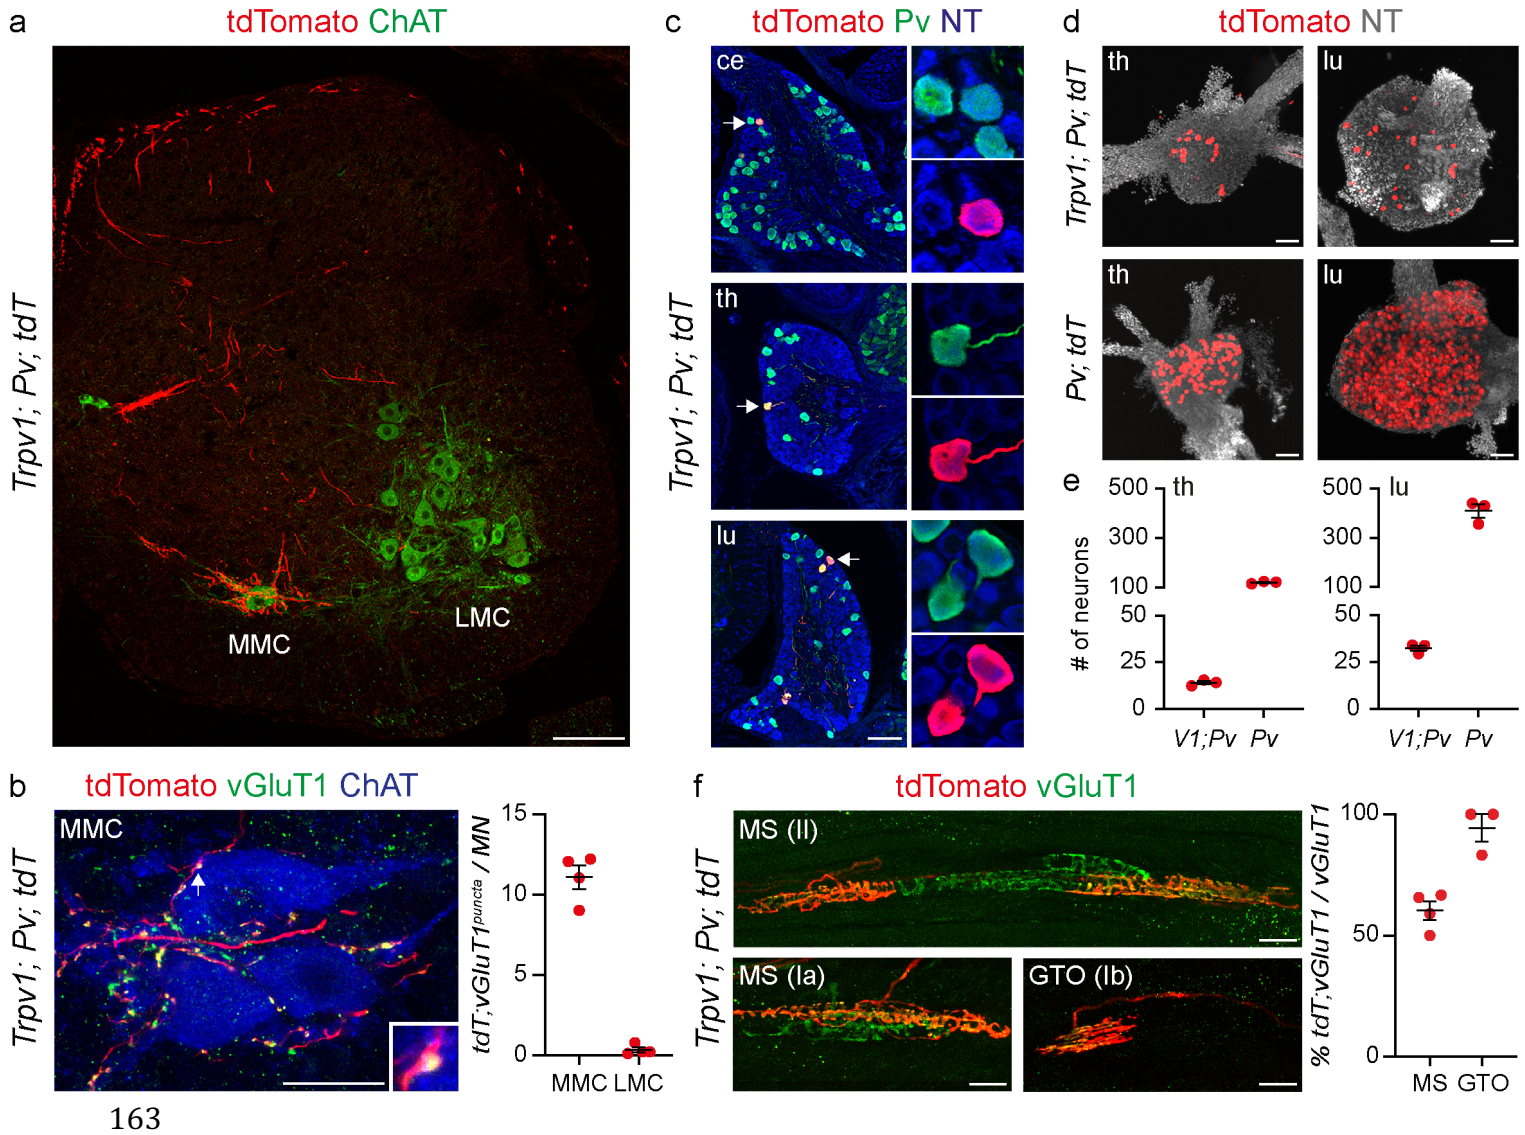

**Fig. 2. Genetic targeting of back muscles innervating proprioceptors.** **a)** Representative image of tdTomato<sup>+</sup> afferents in a lumbar spinal cord section from p7 *Trpv1<sup>Cre</sup>; Pv<sup>Flp</sup>; Ai65* mice. MMC, median motor column; LMC, lateral motor column. Scale bar: 100  $\mu$ m. **b)** Representative image (MMC, left) and quantification (right) of tdTomato<sup>+</sup>; vGluT1<sup>+</sup> presynaptic puncta juxtapsed to MMC or LMC neurons from p7 *Trpv1<sup>Cre</sup>; Pv<sup>Flp</sup>; Ai65* mice. Scale bar: 25  $\mu$ m. **c)** Representative images of cervical, thoracic, and lumbar DRG sections showing tdTomato<sup>+</sup>; Pv<sup>+</sup> neurons in p7 *Trpv1<sup>Cre</sup>; Pv<sup>Flp</sup>; Ai65* mice. Scale bar: 100  $\mu$ m. **d)** Whole mount preparations of thoracic (left) and lumbar (right) DRG showing genetically labelled neurons from p1 *Trpv1<sup>Cre</sup>; Pv<sup>Flp</sup>; Ai65* (top) and *Pv<sup>Cre</sup>; Ai14* (bottom) mice. Scale bar: 100  $\mu$ m. **e)** Number of tdTomato<sup>+</sup> sensory neurons in DRG from p1 *Trpv1<sup>Cre</sup>; Pv<sup>Flp</sup>; Ai65* and *Pv<sup>Cre</sup>; Ai14* at thoracic (T1-T12, left) and lumbar (L1-L5, right) levels (n = 3, mean  $\pm$  SEM). **f)** Representative images (left) and quantification (right) of tdTomato<sup>+</sup> group Ia, II, and Ib afferents in muscle spindles (MS) and Golgi tendon organs (GTO) from the erector spinae muscle of *Trpv1<sup>Cre</sup>; Pv<sup>Flp</sup>; Ai65* mice. Scale bar: 25  $\mu$ m.

164

165 In addition, we assessed whether lineage tracing from the *Trpv1* promoter  
166 (*Trpv1; tdT. Ai14*) (Madisen et al., 2010) would also capture the same population of  
167 proprioceptors. Indeed, we observed labeling of a subset of  $Pv^+$  neurons in cervical,  
168 thoracic, and lumbar DRG, whose central afferents selectively targeted MMC neurons  
169 at all segmental levels (Extended Data Fig. 2f, g). Altogether these data show that *Trpv1*  
170 expression in embryonic proprioceptors defines a subset of proprioceptive sensory  
171 neurons selectively innervating back muscles.

172

### 173 ***Molecular signatures of proprioceptor muscle-type identities***

174 The opportunity to genetically access a defined subset of proprioceptors defined  
175 by their connectivity to the back muscle compartment prompted us to further investigate  
176 the molecular identity of back- (Ba-pSN), abdominal- (Ab-pSN), and hindlimb-  
177 innervating (Li-pSN) neurons. To this end, we dissociated DRG and manually picked  
178 576 tdTomato<sup>+</sup> neurons from thoracic and lumbar levels of *Pv; tdT (Pv<sup>Cre</sup>; Ai14*; 96  
179 thoracic and 96 lumbar neurons) (Hippenmeyer et al., 2007), and *Trpv1; Pv; tdT* mice  
180 (192 thoracic and 192 lumbar neurons) at p1 and performed single-cell transcriptome  
181 analysis (Fig. 3a and Extended Data Fig. 3a). 244 cells passed quality control criteria  
182 (see methods for details) and were found distributed into four clusters expressing high  
183 levels of general proprioceptive markers (Fig. 3b and Extended Data Fig. 3b-e). Cluster  
184 C1 presented signs of glia contamination and was excluded from subsequent analysis  
185 (Extended Data Fig. 3f). For the remaining clusters, we used mouse line and segmental  
186 level of origin of each neuron as means to assign a presumptive muscle identity. We  
187 found that the majority of cells picked from *Trpv1; Pv; tdT* mice, thus bona fide Ba-  
188 pSN, were found in C2 (Fig. 3c, d and Extended Data Fig. 3g). The majority of lumbar  
189 neurons from *Pv; tdT* mice, putative Li-pSN, were found in C3 and the remaining

190 thoracic neurons, by exclusions putative Ab-pSN, in C4 (Fig. 3c, d, and Extended Data

191 Fig. 3g).

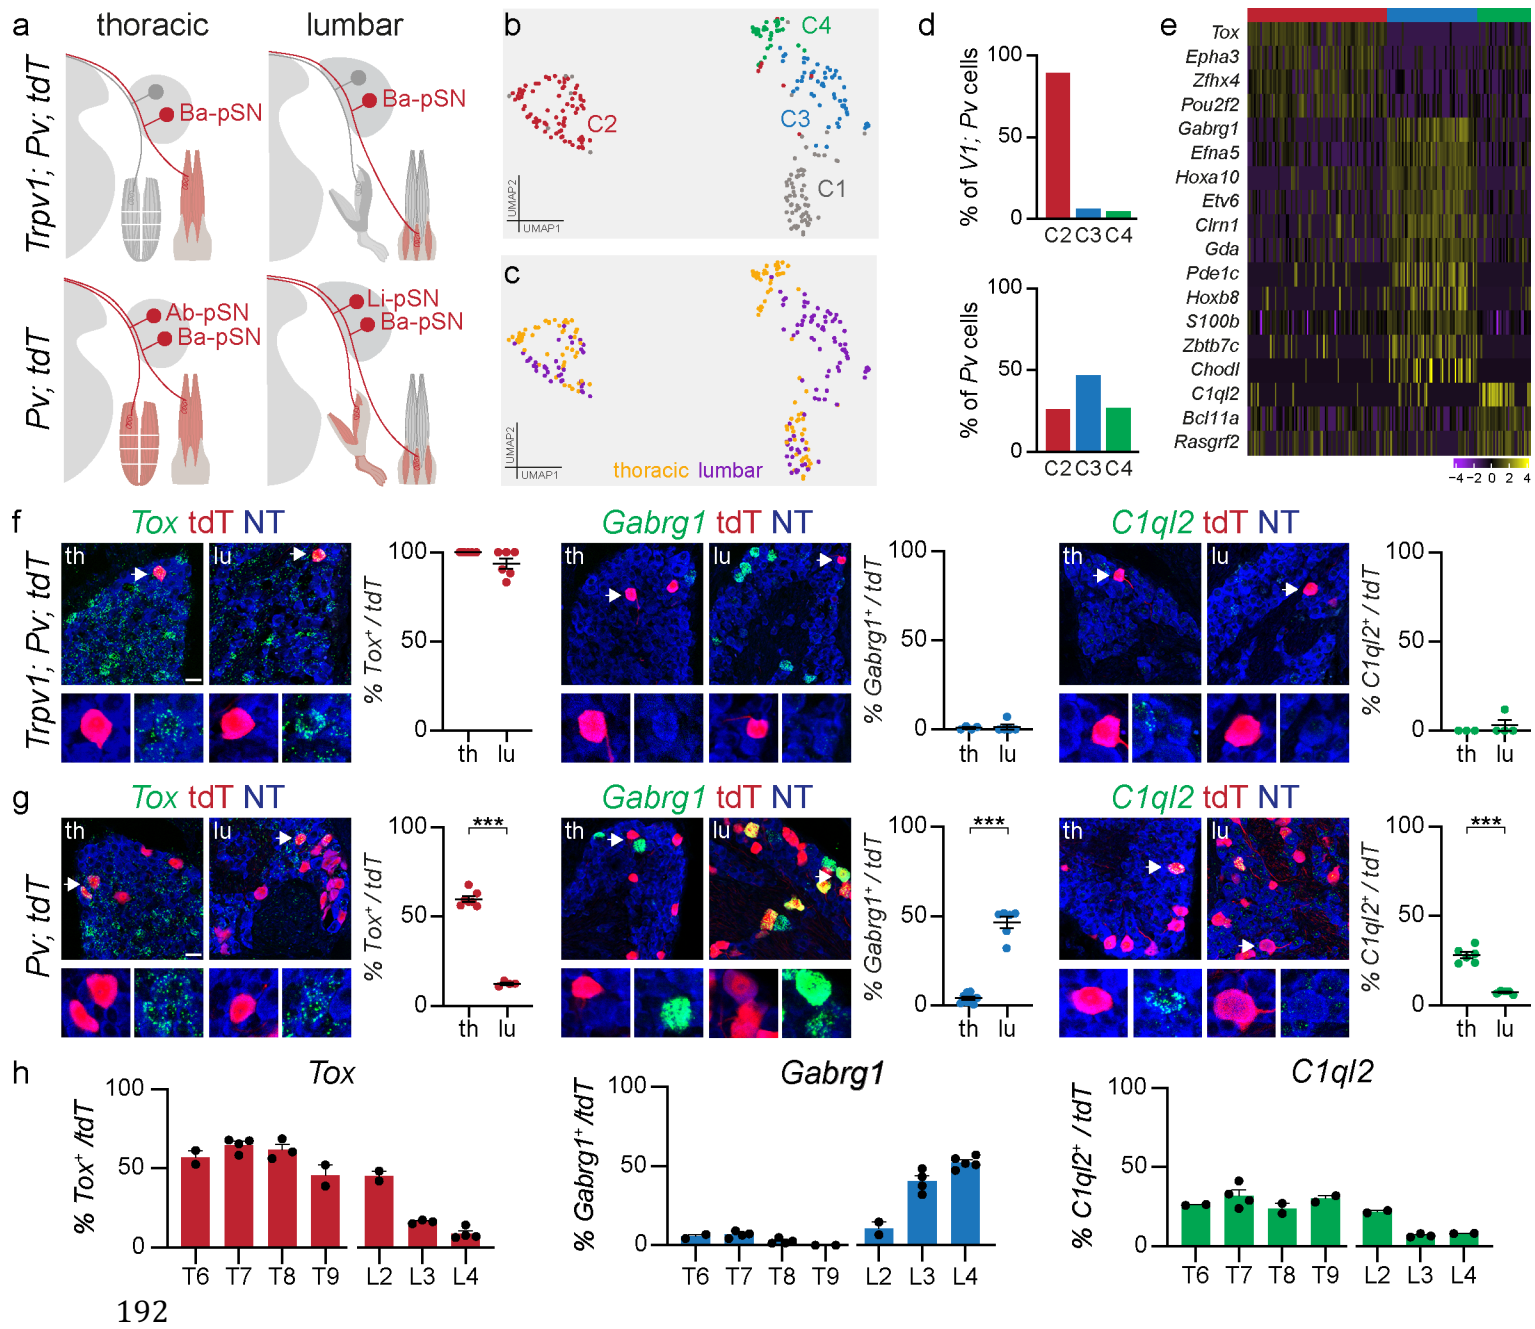

**Fig. 3. Molecular profiles of back-, adnominal- and hindlimb-innervating proprioceptors.** **a**) Schematics illustrating labeling of the Ba-pSN subset captured in *Trpv1<sup>Cre</sup>; Pv<sup>Flp</sup>; Ai65* and all proprioceptors in *Pv<sup>Cre</sup>; Ai14* at thoracic and lumbar levels. **b**) UMAP visualization of cell clusters after transcriptome analysis of tdTomato<sup>+</sup> DRG neurons from p1 *Trpv1<sup>Cre</sup>; Pv<sup>Flp</sup>; Ai65* and *Pv<sup>Cre</sup>; Ai14* mice at thoracic and lumbar levels. **c**) UMAP visualization of cell clusters color-coded according to the anatomical origin (thoracic, yellow; lumbar, purple) of neurons. **d**) Bar graph illustrating the percentage of *Trpv1<sup>Cre</sup>; Pv<sup>Flp</sup>; Ai65* (top) and *Pv<sup>Cre</sup>; Ai14* (bottom) cells found in clusters C2 (red), C3 (blue), C4 (green). **e**) Differential gene expression analysis (logcounts) for clusters C2 (red), C3 (blue), and C4 (green). **f**) Representative smFISH images and quantification of *Tox* (C2), *Gabrg1* (C3), and *C1ql2* (C4) expression in tdTomato<sup>+</sup> thoracic and lumbar DRG neurons from p1 *Trpv1<sup>Cre</sup>; Pv<sup>Flp</sup>; Ai65* mice (each point represents one animal, mean ± SEM). Scale bar: 25 μm. **g**) Representative smFISH images and quantification of *Tox* (C2), *Gabrg1* (C3), and *C1ql2* (C4) expression in tdTomato<sup>+</sup> thoracic and lumbar DRG neurons from p1 *Pv<sup>Cre</sup>; Ai14* mice (each point represents one animal, mean ± SEM, t-test, \*\*\* p < 0.001). Scale bar: 25 μm. **h**) Distribution of *Tox* (C2), *Gabrg1* (C3), and *C1ql2* (C4) in tdTomato<sup>+</sup> neurons from thoracic and lumbar DRG of p1 *Pv<sup>Cre</sup>; Ai14* mice (each point represents one animal, mean ± SEM).

192

197 In addition, lumbar origin of each neuron was independently confirmed by analysis  
198 *Hoxc10* expression (Extended Data Fig. 3h).

199 Differential gene expression analysis revealed molecular signatures for  
200 presumptive Ba-pSN, Ab-pSN, and Li-pSN (Fig. 3e). To validate these findings, we  
201 first analyzed the expression of the top differentially expressed genes, *Tox* (C2, “Ba-  
202 pSN”), *Gabrg1* (C3, “Li-pSN”), and *Clql2* (C4, “Ab-pSN”) (Extended Data Fig. 3i),  
203 in back-innervating proprioceptors labelled in *Trpv1*; *Pv*; *tdT* mice. In agreement with  
204 the predicted identity, *Tox* expression was found in nearly all tdTomato<sup>+</sup> neurons at  
205 thoracic and lumbar levels, while *Gabrg1* and *Clql2* were not (Fig. 3f). Second, we  
206 examined expression and DRG distribution in the overall proprioceptive population  
207 labelled in *Pv*; *tdT* mice. At thoracic levels, where proprioceptors innervating back and  
208 abdominal muscle groups are located, we observed *Tox* expressed in ~ 60% of  
209 tdTomato<sup>+</sup> neurons and *Clql2* in ~ 28%. At lumbar levels, where limb-innervating  
210 proprioceptors are predominant, we found *Gabrg1* in ~ 46% of tdTomato<sup>+</sup> neurons and  
211 *Tox* in ~ 10% (Fig. 3g). Altogether these data indicate that *Tox* and *Clql2* are expressed  
212 within thoracic DRG and *Gabrg1* in lumbar DRG with frequencies expected for Ba-  
213 pSN, Ab-pSN and Li-pSN markers (Fig. 3h). Moreover, we found that expression of  
214 either *Gabrg1* or *Efna5*, another transcript differentially expressed in C3, covers ~ 75%  
215 tdTomato<sup>+</sup> neurons at lumbar level, thus indicating that combination of multiple genes  
216 is necessary to define the hindlimb compartment (Extended Data Fig. 3j). Finally, in  
217 order to check whether effects of lineage tracing in *Pv*; *tdT* mice might influence the  
218 results, we analyzed expression of *Tox*, *Gabrg1*, and *Clql2* in *Pv*<sup>+</sup> DRG neurons from  
219 wild-type mice and observed similar patterns and frequencies of expression at thoracic  
220 and lumbar levels (Extended Data Fig. 3k). Altogether, these data confirm that  
221 molecular markers of putative proprioceptor muscle subtypes identified with

222 transcriptome analysis are expressed in thoracic and lumbar proprioceptive neurons  
223 from *Trpv1*; *Pv*; *tdT*, *Pv*; *tdT*, and wild-type mice with specificity and frequency  
224 consistent with back, abdominal and hindlimb muscle identities.

225

### 226 ***Proprioceptor muscle identity emerges during early development***

227 In order to further validate these observations and directly link molecular  
228 identity to muscle identity, we investigated expression of markers in proprioceptors  
229 subtypes identified by their muscle connectivity. To this end, we examined *Tox* (C2,  
230 “Ba-pSN”), *Gabrg1* (C3, “Li-pSN”), and *C1ql2* (C4, “Ab-pSN”) expression in DRG  
231 neurons retrogradely labeled after cholera toxin B (CTB) injection in representative  
232 back (erector spinae, ES) and hindlimb (gastrocnemius, GS; tibialis anterior, TA)  
233 muscles. We found that the majority of CTB<sup>+</sup>; *Pv*<sup>+</sup> neurons connected to ES expressed  
234 *Tox*, but neither *Gabrg1* nor *C1ql2* (Fig. 4a and Extended Data Fig. 4a). Conversely,  
235 proprioceptors labelled after CTB injections in hindlimb muscles expressed *Gabrg1*,  
236 but neither *Tox* nor *C1ql2* (Fig. 4b and Extended Data Fig. 4a). Altogether, these data  
237 show that genetic tracing and retrograde labeling experiments validated the findings of  
238 transcriptome analysis.

239 Next, we asked whether gene expression profiles characterizing proprioceptor  
240 muscle identity at p1 were already present at earlier developmental stages. We analyzed  
241 correlation in expression of transcripts defining Ba-, Ab-, and Li-pSN identities at p1  
242 and e15.5. As expected, we found high correlation at p1, in addition, strong co-  
243 expression patterns of the same signature genes were also observed at e15.5  
244 indicating that molecular features defining proprioceptor muscle identities are already  
245 present during embryonic development (Fig. 4c and d).

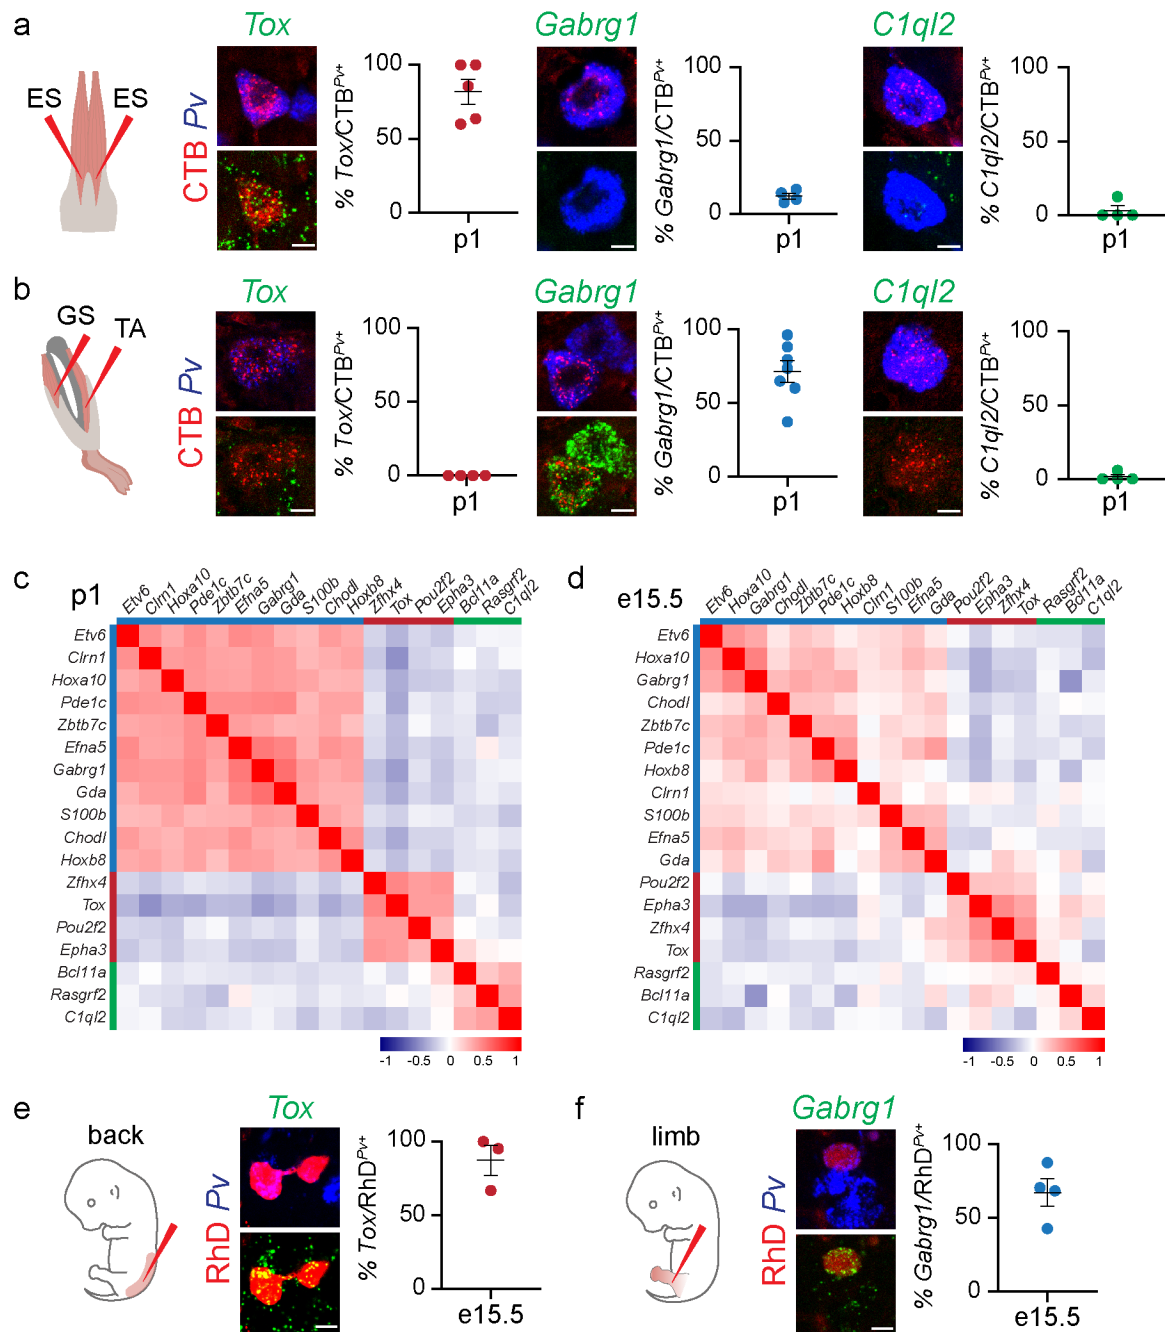

246

**Fig. 4. Proprioceptor muscle identity emerge at early developmental stages.** **a and b)** Representative smFISH images and quantification of *Tox* (C2), *Gabrg1* (C3), and *C1ql2* (C4) expression in Pv<sup>+</sup> sensory neurons retrogradely labelled after cholera-toxin B (CTB) injection in back (**a**; erector spinae, ES) and hindlimb (**b**; gastrocnemius, GS and tibialis anterior, TA) of p1 wild-type mice (each point represents one animal, mean  $\pm$  SEM). Scale bar: 10  $\mu$ m. **c and d)** Heatmaps representing pairwise gene expression correlation values for Ba-pSN (red), Ab-pSN (green), and Li-pSN (blue) molecular signatures at p1 (top) and e15.5 (bottom; Pearson's  $r$  using logcounts). **e and f)** Representative smFISH images and quantification of *Tox* (C2), and *Gabrg1* (C3), expression in Pv<sup>+</sup> sensory neurons retrogradely labelled after rhodamine-dextran (RhD) injection in e15.5 back (**e**) and hindlimb (**f**) muscles of wild-type mice (each point represents one animal, mean  $\pm$  SEM). Scale bar: 10  $\mu$ m.

253 To confirm this finding, we examined expression of *Tox* and *Gabrg1*, in e15.5 DRG  
254 neurons retrogradely labeled after rhodamine-dextran (RhD) injection either in back or  
255 hindlimb muscles. As previously observed for postnatal stages, we found that  
256 expression of *Tox* and *Gabrg1* in embryonic proprioceptors is predictive of their  
257 specific peripheral connectivity patterns, with *Tox* labeling RhD<sup>+</sup>; *Pv*<sup>+</sup> back-innervating  
258 neurons and *Gabrg1* hindlimb-innervating ones (Fig. 4e, f and Extended Data Fig. 4b).  
259 Finally, we examined expression of p1 muscle-type markers (*Tox*, *Gabrg*, and *C1ql2*)  
260 in proprioceptor clusters identified at e15.5. We found that *Tox* expression characterizes  
261 three clusters (pC3, pC5 and pC6) of which two have predominant thoracic component,  
262 including the *Trpv1*<sup>+</sup> neurons in pC6, that represent Ba-pSN (Fig. 1d, e, f, g and  
263 Extended Data Fig. 1k). Consistent with Li-pSN, *Gabrg1* was found in two clusters  
264 (pC2 and pC7) whose neurons originate mainly from lumbar DRG, while *C1ql2*  
265 expression characterizes pC1 the only cluster formed by a majority of thoracic neurons,  
266 thus supporting Ab-pSN identity (Fig. 1d, e, f, g and Extended Data Fig. 1k).

267 Altogether these data indicate that molecular profiles of proprioceptor muscle  
268 subtypes identified at p1 are already present at e15.5 and part of developmental  
269 programs arising at embryonic stages before end-organ receptor identity consolidates  
270 (Oliver et al., 2021; Wu et al., 2021). Indeed, expression of molecular signatures  
271 recently identified for Ia, Ib and II receptor subtypes do not start being correlated in our  
272 datasets until p1 (Extended data Fig. 5).

273

#### 274 ***Ephrin-A/EphA signaling controls proprioceptor muscle targeting***

275 The presence of molecular correlates of proprioceptor muscle character at early  
276 developmental stages suggests that signature genes defining different subtypes may be  
277 involved in the acquisition of their identities. Strikingly, the expression of *Efna5* and



278 *Epha3* - members of the ephrin-A and EphA family of axon guidance ligands and  
279 receptors - distinguishes Ba- and Li-pSN (Fig. 3e, 4c, d and Extended Data Fig. 6a).  
280 Moreover, we found that other members of the EphA receptor family (*Epha4*, *Epha5*,  
281 and *Epha7*) are also differentially expressed in proprioceptor clusters, both at e15.5 and  
282 p1 (Fig. 5a). We validated these findings *in vivo* by characterizing expression of *Efna5*  
283 and *Epha3* in proprioceptors labelled in *Pv*; *tdT* and *Trpv1*; *Pv*; *tdT* mice at e15.5 and  
284 p1 (Fig. 5b and Extended Data Fig. 6b-d). In addition, we further confirmed these data  
285 by analyzing *Efna5* and *Epha3* expression in *Pv*<sup>+</sup> sensory neurons retrogradely labelled  
286 after CTB injection in back and hindlimb muscles. We found that the majority of CTB<sup>+</sup>;  
287 *Pv*<sup>+</sup> neurons connected to hindlimb muscle expressed *Efna5* but not *Epha3* (Fig. 5c).  
288 Conversely, all the proprioceptors labelled after CTB injections in ES muscle expressed  
289 *Epha3*, but not *Efna5* (Fig. 5d). These data show that *Efna5* and *Epha3* are differentially  
290 expressed in Ba- and Li-pSN neurons, suggesting a function in controlling target  
291 specificity, an intriguing possibility considering the prominent role of ephrins and their  
292 receptors in axon guidance during development of the nervous system (Kania and  
293 Klein, 2016). First, in order to test whether ephrin-A5 controls proprioceptor peripheral  
294 connectivity, we injected CTB in hindlimb muscles of mice lacking ephrin-A5 function  
295 (*Efna5*<sup>-/-</sup>; Fig. 5e) (Frisén et al., 1998). First, to assess labeling specificity and whether  
296 elimination of ephrin-A5 was affecting motor neuron connectivity we examined the  
297 position and number of retrogradely labelled motor neurons. As previously reported,  
298 we did not find any significant difference in motor neuron muscle connectivity in  
299 *Efna5*<sup>-/-</sup> mice (Bonanomi et al., 2012) (Extended Data Fig. 6e-g).

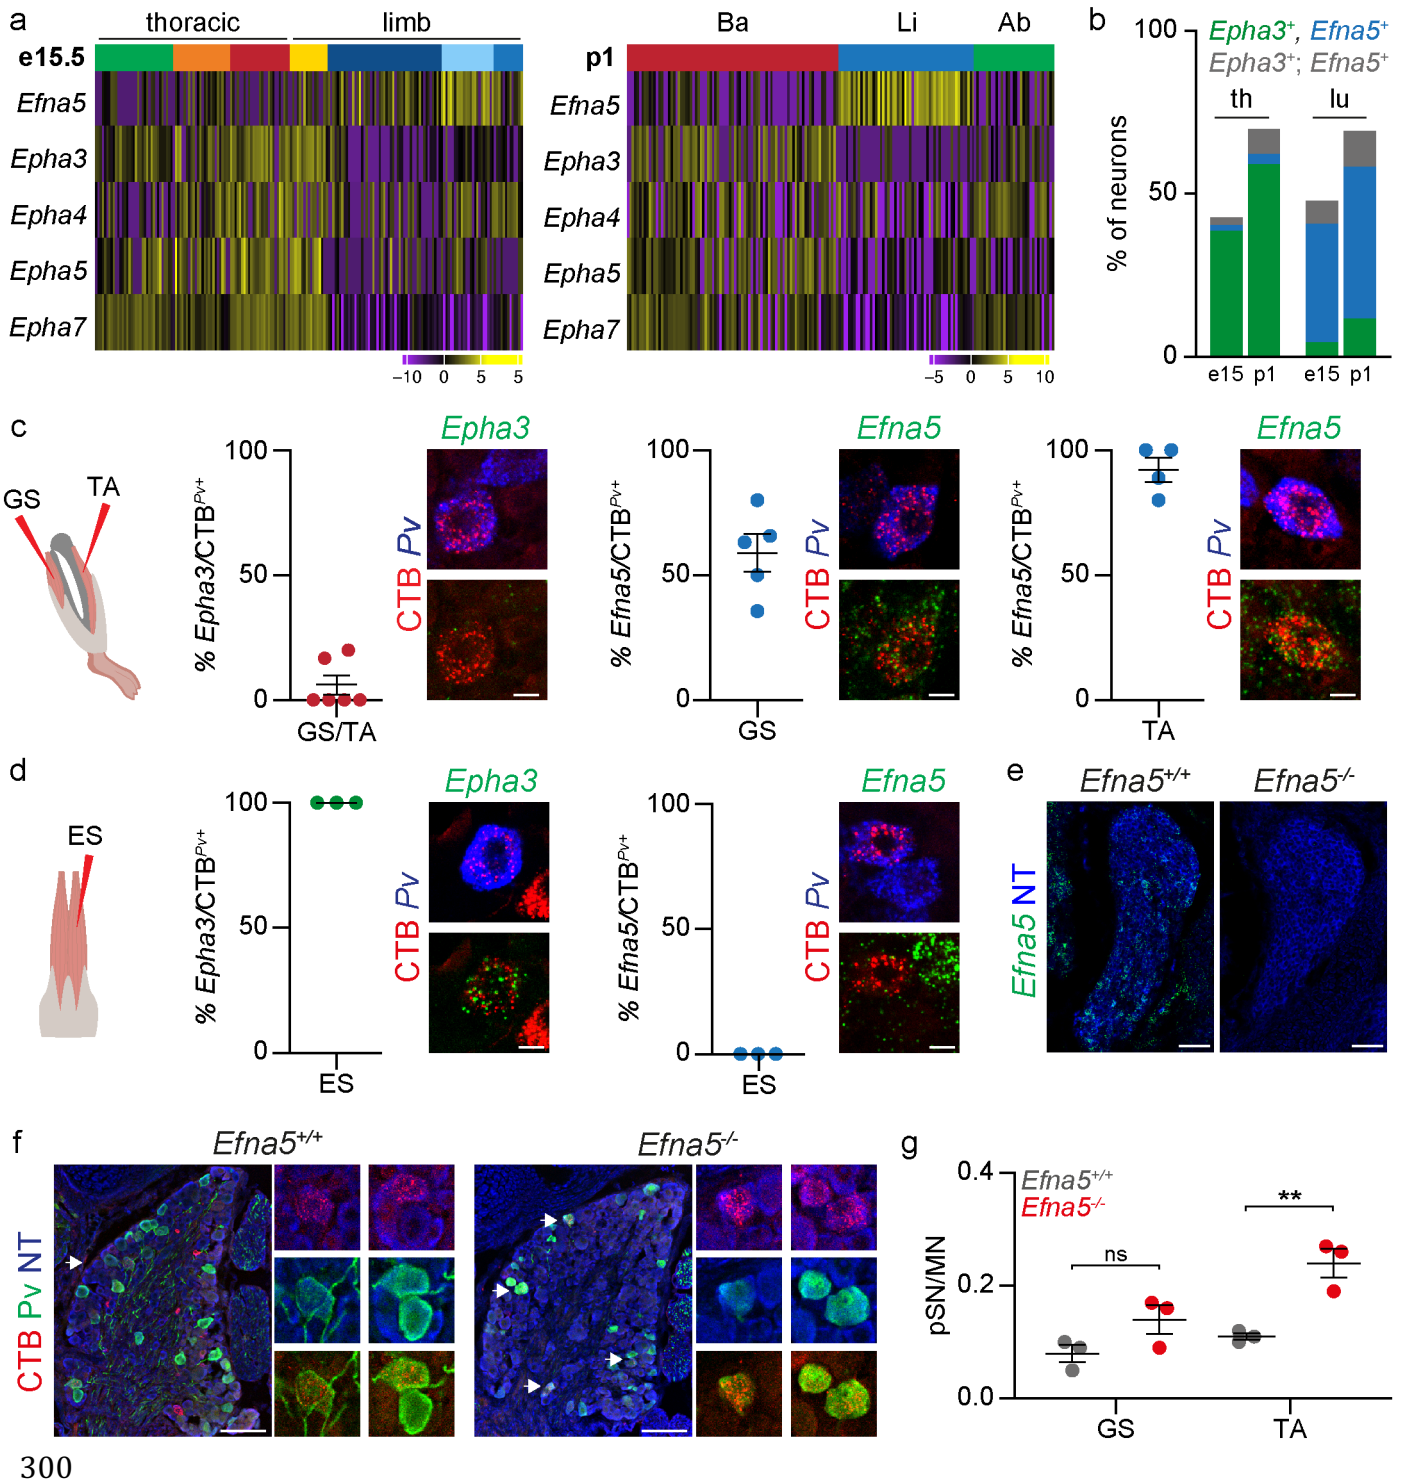

300

**Fig. 5. Elimination of ephrin-A5 function erodes the specificity of muscle connectivity.** **a)** Gene expression analysis (logcounts) of ephrin-A/EphA family members differentially expressed in proprioceptor clusters identified at e15.5 (thoracic origin: green, orange, red; lumbar origin: dark blue, blue, light blue, and yellow) and p1 (Back: red; hindlimb: blue; abdominal green). **b)** Percentage of Pv<sup>+</sup> or tdTomato<sup>+</sup> sensory neurons expressing *Epha3* (green), *EfnA5* (blue) or *Epha3*; *EfnA5* (gray) at thoracic and lumbar levels in either e15.5 or p1 *Pv*<sup>Cre</sup>; *Ail4* mice. **c)** Representative smFISH images and quantification of *Epha3* (left) and *EfnA5* (center/right) expression in Pv<sup>+</sup> sensory neurons retrogradely labelled after CTB injection in gastrocnemius (GS), and tibialis anterior (TA) muscles of p1 wild-type mice (each data point represents one animal, mean ± SEM). Scale bar: 10 μm. **d)** Representative smFISH images and quantification of *Epha3* (left) and *EfnA5* (right) expression in Pv<sup>+</sup> sensory neurons retrogradely labelled after CTB injection in the erector spinae (ES) muscle of p1 wild-type mice (each point represents one animal, mean ± SEM). Scale bar: 10 μm. **e)** Representative smFISH images of *EfnA5* expression in lumbar DRG of p1 *EfnA5*<sup>+/+</sup> and *EfnA5*<sup>-/-</sup> mice. Scale bar: 25 μm. **f)** Representative images of Pv<sup>+</sup>; CTB<sup>+</sup> sensory neurons retrogradely labelled after CTB injection in the tibialis anterior (TA) muscle of p1 *EfnA5*<sup>+/+</sup> (left) and *EfnA5*<sup>-/-</sup> (right) mice. Scale bar: 100 μm. **g)** Ratio of proprioceptor (Pv<sup>+</sup>) per motor neuron labelled after CTB injection in the gastrocnemius (GS) and tibialis anterior (TA) muscles of p1 *EfnA5*<sup>+/+</sup> (gray) and *EfnA5*<sup>-/-</sup> (red) mice (each point represents one animal, mean ± SEM, t-test, ns p > 0.05, \*\* p < 0.01).

306 Next, we examined the number of retrogradely labeled proprioceptors, as well as the  
307 ratio of proprioceptor to motor neuron labeling, and found a significant increase in the  
308 number of neurons retrogradely labelled from the TA muscle, and a similar trend,  
309 although not significant, for the GS muscle, whose proprioceptors are only partially  
310 defined by *Efna5* expression (Fig. 5c, f, g and Extended Data Fig. 6g). Thus, these data  
311 show that elimination of ephrin-A5 function erodes the specificity of hindlimb muscle  
312 connectivity and indicate that the molecular signatures of muscle subtypes comprise  
313 programs controlling defining features of proprioceptor muscle-type identity.

## 314 **Discussion**

315           This work defines the molecular signatures underlying proprioceptor subtypes  
316 defined by their muscle connectivity. We found that molecular distinctions emerge  
317 during embryonic development before the onset and consolidation of receptor character  
318 and comprise programs that control the specificity of muscle connectivity. These  
319 findings set the stage for defining the mechanisms controlling the acquisition of  
320 proprioceptor identity at a single muscle level and the generation of a new toolbox for  
321 analyzing the physiological roles of proprioceptor subtypes and define the contribution  
322 of sensory feedback from different muscle groups in the control of movement and the  
323 generation of the sense of body position in space.

324           We identified and validated molecular signatures for proprioceptor innervating  
325 cardinal muscle groups: back (*Tox*, *Epha3*), abdominal (*C1ql2*), and hindlimb (*Gabrg1*,  
326 *Efna5*). Markers for back and abdominal subtypes at thoracic level (*Tox* and *C1ql2*)  
327 account for almost the entire proprioceptor population in thoracic DRG (~ 88%; Fig.  
328 3g), thus indicating that our approach comprehensively captured most of the neurons  
329 innervating muscles at trunk level. In contrast, both *Gabrg1* (~ 46%) and *Efna5* (~ 66%)  
330 alone only capture about half of limb-innervating proprioceptors each, but together they  
331 account for about 75% of Pv<sup>+</sup> sensory neurons in lumbar DRG (Fig. 3g, 5b, Extended  
332 Data Fig. 3j). The great anatomical complexity of limbs, comprising 39 different  
333 muscles in the mouse hindlimb (Charles et al., 2016), is consistent with a model  
334 requiring a combination of multiple molecules in order to represent the whole  
335 compartment. The presence of multiple clusters associated with general back and  
336 hindlimb identities at e15.5 indicate that their molecular makeup may already capture  
337 features of more fine-grained identities defined according to specific anatomical (i.e.:

338 rostral vs. caudal back; dorsal vs. ventral limb) or functional (i.e.: synergist vs.  
339 antagonist) characteristics.

340       Upon acquisition of a generic proprioceptor fate (Marmigère and Ernfors,  
341 2007), sensory neurons mature to develop functional features defined by their muscle  
342 and end-organ receptor identities. First, sensory axons navigate peripheral targets and  
343 innervate mechanoreceptive end-organs with precise ratios and distributions according  
344 to the biomechanical requirements of the innervated muscle (Banks et al., 2009). In  
345 addition, each proprioceptor subtype needs to establish specific sets of connections with  
346 multiple neural targets in the central nervous system in order to relay sensory feedback  
347 to motor circuits controlling the activity of relevant muscles (Chen et al., 2006; Mears  
348 and Frank, 1997). Our data support a model where proprioceptor muscle identity  
349 emerges as part of an embryonic genetic program controlling connectivity to its central  
350 and peripheral targets that is refined at later stages to include aspects of receptor-type  
351 character (MS and GTO), such as distinct physiological properties, whose  
352 diversification is influenced by neuronal activity (Wu et al., 2021). In support of this  
353 view, signatures of proprioceptor muscle-type identities are clearly evident from e15.5,  
354 while group Ia, Ib, and II molecular profiles have been shown to emerge later and  
355 consolidate during postnatal development (Oliver et al., 2021; Wu et al., 2019, 2021).  
356 Accordingly, molecular correlates defining receptor identity are not immediately  
357 evident in the muscle-type profiles we identified at e15.5, but start emerging at p1. A  
358 notable exception is represented by *Tox* and *Chodl*, which have been previously  
359 proposed to represent markers of two groups of type II afferents (II<sub>2</sub> and II<sub>4</sub>) at early  
360 postnatal stages (Wu et al., 2021). These molecules define back (*Tox*) and hindlimb  
361 (*Chodl*) muscle subtypes in our analysis. Interestingly, groups II<sub>2</sub> and II<sub>4</sub> were found to  
362 be enriched in DRG at thoracic and lumbar levels respectively, thus confirming our

363 results and indicating that the diversity observed in type II proprioceptors may already  
364 include signatures of muscle-type identity (Wu et al., 2021). Altogether, these  
365 observations suggest that “receptor” features become superimposed to “muscle”  
366 character already present since early development in order to generate the final  
367 functional subtype identity. Future studies building on these findings bear the promise  
368 to define the developmental processes controlling proprioceptor specification from  
369 general proprioceptive fate determination to the acquisition of muscle identity and  
370 maturation of physiological characteristics at receptor level.

371         The specificity with which proprioceptors innervate respective muscle targets  
372 in the periphery and synaptic partners in the central nervous system provides the circuit  
373 basis for the function of spinal sensorimotor circuits (Tuthill and Azim, 2018). Our data  
374 shows that the ephrin-A/EphA family of axon guidance molecules is an important  
375 regulator of proprioceptor peripheral connectivity. We found that differential  
376 expression of *ephrin-A5* and four EphA receptors (*EphA3*, *EphA4*, *EphA5*, and *EphA7*)  
377 delineate a distinction between hindlimb- and abdominal/back-projecting  
378 proprioceptors, and perturbation of ephrin-A5 function leads to an erosion in the  
379 specificity of muscle connectivity. The phenotype indicates that *Efna5* may be part of  
380 a developmental program controlling the precision of muscle innervation. Ephrin  
381 signaling is known to have important roles in the guidance of somatosensory and motor  
382 axons to their peripheral targets (Kania and Klein, 2016). It has been shown that at early  
383 embryonic stages nascent sensory axons track along motor axons *en route* to their  
384 peripheral targets and trans-axonal interactions control navigation of sensory neurons  
385 to axial targets (Gallarda et al., 2008). In particular, interactions between EphA3/4 in  
386 motor axons and ephrin-A2/A5 in somatosensory axons have been shown to control  
387 innervation of the epaxial compartment by sensory neurons. In their absence, epaxial

388 sensory nerves are re-routed to hypaxial targets (Wang et al., 2011). We observed a  
389 significant increase in the number of proprioceptors innervating the tibialis anterior  
390 muscle in mice lacking ephrin-A5, indicating that excessive limb muscle innervation  
391 might result from mistargeting of axons originally directed to another muscle whose  
392 identity remain elusive. However, we did not observe any difference in the connectivity  
393 to a representative back muscle, as the number of pSN retrograde labelled after ES  
394 injection in *EfnA5* *-/-* and control mice was unaffected (Extended Data Fig. 6h-k).  
395 Ephrin-A/EphA signaling also controls the choice of limb innervating motor neurons  
396 to invade either the dorsal or ventral half of the limb mesenchyme and could influence  
397 muscle by muscle dependence of proprioceptive axon innervation specificity  
398 (Bonanomi et al., 2012; Helmbacher et al., 2000; Kania and Jessell, 2003). Because of  
399 the intricacy of ephrin-Eph signaling (Kania and Klein, 2016), it will be necessary to  
400 carefully analyze the expression pattern and function of different ligands, receptors, and  
401 coreceptors in order to define the molecular logic governing guidance of proprioceptors  
402 to their specific muscle targets.

403         The importance of proprioceptive sensory feedback in motor control is clearly  
404 evident in mouse models where proprioceptor development or function is perturbed.  
405 Degeneration of muscle spindles in *Egr3* mutant mice result in ataxia and, similarly,  
406 loss of most proprioceptors in absence of *Runx3* function results in severe coordination  
407 phenotypes (Akay et al., 2014; Levanon et al., 2002; Tourtellotte and Milbrandt, 1998).  
408 Moreover, elimination of the mechanosensory transduction channel *Piezo2* in  
409 proprioceptors leads to severely uncoordinated body movements and limb positions  
410 (Woo et al., 2015). Despite the critical role of proprioception for the generation of  
411 coordinated movement, it is still not understood how proprioceptive feedback from  
412 different muscles and receptor subtypes integrates with motor commands and other

413 sources of sensory input to adjust motor output and generate the sense of body position  
414 in space (Pearson, 2004; Windhorst, 2007). This is mainly due to the fact that behavioral  
415 studies have been hampered by the lack of tools allowing precise access to different  
416 functional subtypes of proprioceptors. The identification of molecular signatures for  
417 proprioceptor muscle subtypes opens the way for the generation of new genetic and  
418 viral tools to selectively access distinct channels of proprioceptive information and  
419 bears the promise to determine their roles in motor control.



## 420 **Acknowledgements**

421 We thank Liana Kosizki for technical support, Mathias Richter and the MDC  
422 Advanced Light Microscope facility for assistance with light sheet microscopy. We are  
423 grateful to Martyn Goulding and Mark Hoon for sharing mouse lines. We thank Susan  
424 Brenner-Morton for sharing antibodies. We thank Robert Manteufel, Ilka Duckert, and  
425 Florian Keim for animal care. We are grateful to Dario Bonanomi for helpful  
426 discussions; Nikos Balaskas, Joriene de Nooij, and members of the Zampieri laboratory  
427 for insightful comments on the manuscript. N.Z. was supported by DFG grant ZA  
428 885/1-2; G.G. by Helmholtz (VH-NG-1153), KWF (NKI-2014-7208), and ERC  
429 (714922).

430

## 431 **Author contributions**

432 Conceptualization, S.D. and N.Z.; Investigation, S.D., C.C., K.S., L.R., and  
433 E.D.L.; Formal analysis, S.D., C.C., L.R. and G.G.; Writing – Original Draft, S.D. and  
434 N.Z.; Writing – Review and Editing, S.D., C.C., K.S., L.R., E.D.L., C.B., G.G., and  
435 N.Z.; Supervision, C.B., G.G., and N.Z.

436

## 437 **Competing interests**

438 The authors declare no competing interests.

439

## 440 **Data and materials availability**

441 All unique reagents generated in this study are available from the Lead Contact  
442 without restriction. Datasets generated in the current study are deposited in GEO. The  
443 scripts and source data for the plots are available upon request.

444 **Methods**

445 *Animal experimentation ethical approval*

446 All experiments were performed in compliance with the German Animal  
447 Welfare Act and approved by the Regional Office for Health and Social Affairs Berlin  
448 (LAGeSo) under license numbers G0148/17 and G0191/18.

449

450 *Animal models*

451 Mice were housed in standardized cages under 12h light-dark cycle with food  
452 and water *ad libitum*. For this study the following mouse lines were used *Pv<sup>Cre</sup>*  
453 (Hippenmeyer et al., 2007), *Pv<sup>Flp</sup>* (Madisen et al., 2015), *Pv<sup>tdTom</sup>* (Kaiser et al., 2016),  
454 *Trpv1<sup>Cre-Basbaum</sup>* (Cavanaugh et al., 2011), *Trpv1<sup>Cre-Hoon</sup>* (Mishra et al., 2011), *Ail4*  
455 (Madisen et al., 2010), *Ai65* (Madisen et al., 2015), and *Efna5<sup>-/-</sup>* (Frisén et al., 1998).

456

457 *Single-cell isolation*

458 Dorsal root ganglia were dissected separately from thoracic (T1-T12) and  
459 lumbar (L1-L5) segments and collected in F12 medium with 10% FHS (Fetal horse  
460 serum) on ice. Next, DRGs were incubated in F12/FHS with 0,125% collagenase  
461 (Sigma C0130) for 1 hour (p1) or 30 min (e15.5) at 37°C. After 3 washes with PBS  
462 DRGs were transferred to 0,25% trypsin solution (Gibco 15050-065) and incubated for  
463 15 min at 37°C. Afterwards, DRG were mechanically triturated using a fire polished  
464 Pasteur pipette until a homogenized solution was visible followed by a centrifugation  
465 step at 200 x g for 10 min. The final cell pellet was resuspended in HBSS (10 mM  
466 HEPES, 10 mM Glucose) and the resulting cell suspension either applied to  
467 fluorescence-activated cell sorting (FACS) (e15.5) or manual cell picking under an

468 inverted fluorescent microscope (p1). Single tdTomato<sup>+</sup> cells were sorted into  
469 individual wells containing lysis buffer and stored at -80°C until further processing.

470

### 471 ***Single-cell RNA sequencing***

472 For cDNA library preparation the CEL-Seq2 protocol was used as previously  
473 described (Hashimshony et al., 2016). We sequenced 960 cells (480 from T1-T12 and  
474 480 from L1-L5) at e15.5 and 576 (96 thoracic and 96 lumbar from *Pv<sup>Cre</sup>; Ai14*; 96  
475 thoracic and 96 lumbar from *Trpv1<sup>Cre-Basbaum</sup>; Pv<sup>Flp</sup>; Ai65*; 96 thoracic and 96 lumbar  
476 from *Trpv1<sup>Cre-Hoon</sup>; Pv<sup>Flp</sup>; Ai65*) at p1. The libraries were sequenced on an Illumina  
477 NextSeq500 platform with high-output flow cells by the Next Generation Sequencing  
478 Core Facility of the Max-Delbrück Center for Molecular Medicine.

479

### 480 ***Single-cell analysis***

481 For both data sets (e15.5 and p1) we used the scruff v1.4.0 package (R package  
482 version 1.12.0) to demultiplex, map, and generate count matrices. Then, we evaluated  
483 each data set statistics using Scater v1.14.6 R package. To increase the quality of the  
484 experiments, we individually removed low-quality cells based on low total gene counts  
485 (> quantile 0.3), low gene abundance (> quantile 0.3), and high mitochondrial gene  
486 values cells (< quantile 0.75). 519 out of 960 e15.5 cells and 244 out of 576 p1 cells  
487 passed quality control criteria. After log-normalization, we used the scran v1.14.1  
488 buildKNNGraph and cluster\_walktrap functions with default parameters to define each  
489 data-set cell populations and subclusters. Finally, we assigned gene markers to each  
490 population using findMarkers function from the scran with default parameters. For  
491 single cell analysis R v3.6.2 environment was used to generate the results, statistical  
492 analysis and graphical evaluation of the datasets.

493 ***Dissection and tissue processing***

494 Postnatal mice were anesthetized by intraperitoneal injection of 120 mg/kg  
495 ketamine and 10 mg/kg xylazine and transcardially perfused with PBS and 4% PFA in  
496 0,1 M phosphate buffer. To expose the spinal cord a ventral laminectomy was  
497 performed and the tissue post-fixed O/N in 4% PFA at 4°C. The next day tissue was  
498 washed three times with ice-cold PBS and transferred to 30% sucrose in PBS for  
499 cryoprotection at 4°C O/N. Tissue was embedded in Tissue-Tek OCT embedding  
500 compound and stored at -80°C. 16 µm tissue sections for immunohistochemistry were  
501 acquired at a cryostat, dried for 1 hour and either directly used or frozen at -80°C.

502

503 ***Immunohistochemistry and fluorescent in situ hybridization***

504 For immunohistochemistry dry tissue sections were washed for 10 min with  
505 PBS followed by another 10 min incubation of 0.1% Triton-X-100 in PBS (0.1% PBX)  
506 for permeabilization. The following primary antibodies were diluted in 0.1% PBX and  
507 incubated O/N at 4°C: Ch-anti-Pv (1:5000, generous gift from Susan Brenner-Morton),  
508 Goat-anti-ChAT (1:200), GP-anti-vGluT1 (1:5000, generous gift from Susan Brenner-  
509 Morton), Rb-anti-dsRed (1:1000) and Rb-anti-RFP (1:500). Next, slides were washed  
510 three times for 5 minutes with 0.1% PBX followed by secondary antibody/NeuroTrace  
511 incubation for 1 hour at room temperature (RT). Secondary antibodies (Jackson  
512 Immuno Research Laboratories) and NeuroTrace (Life Technologies) were diluted in  
513 0.1 % PBX as following: Cy3, Alexa488 (1:1000), Cy5 (1:250), and NeuroTrace  
514 (1:250). After staining with secondary antibodies slides were washed three times with  
515 0.1% PBX and subsequently mounted with Vectashield antifade mounting medium. For  
516 fluorescent *in situ* hybridization the RNAscope Multiplex Fluorescent Kit v2 (ACDBio)  
517 with a modified manufactures protocol was used. Tissue sections were acquired as

518 described above. Sections were dried, fixed with ice-cold 4% PFA in PBS for 15 min  
519 and dehydrated in a series of 50%, 70% and 100% ethanol for 5 min each. Afterwards,  
520 sections were treated with hydrogen peroxide solution for 15 min at RT to block  
521 endogenous peroxidase activity followed by another wash with 100% ethanol for 5 min.  
522 Next either Protease IV (postnatal tissue) or Protease III (embryonic tissue and sections  
523 from CTB tracing experiments) was applied for 30 min at RT. After three washes with  
524 PBS probes were applied and hybridization performed in a humidified oven at 40°C for  
525 2 hours. The following probes were used in this study: Mm-Epha3-C1, Mm-Tox-C1,  
526 Mm-C1ql2-C1, Mm-Efna5-C2, Mm-Trpv1-C2, Mm-Pvalb-C2, Mm-Pvalb-C3, Mm-  
527 Gabrg1-C3, and Mm-Runx3-C3. Following hybridization, amplification was  
528 performed using Amp1, Amp2 and Amp3 each for 30 min at 40°C. For detection each  
529 section was treated sequentially with channel specific HRP (HRP-C1, HRP-C1, HRP-  
530 C3) for 15 min, followed by TSA mediated fluorophore (Akoya Bioscience, Opal 520,  
531 Opal 570, and Opal 690) binding for 30 min and final HRP blocking for 15 min (all  
532 steps at 40°C). When necessary additional immunostaining was performed as described  
533 above. For quantification cell bodies (evaluated by Nissl staining) colocalizing with  $\geq 5$   
534 puncta were counted positive.

535

### 536 *Tissue clearing and light-sheet microscopy*

537 Mice were anesthetized and transcardially perfused as described above.  
538 Afterwards, spinal cord and/or DRG were extracted after ventral laminectomy and  
539 postfixed in 4% PFA for 2 days at 4°C. DRG were kept separately and embedded into  
540 1% low melt agarose in OptiPrep (Sigma) after post fixation. Tissue clearing was  
541 performed as previously described with modifications (Susaki et al., 2015). In short,  
542 tissue was transferred to CUBIC1 (25 wt% Urea, 25 wt% N,N,N',N'-tetrakis(2-

543 hydroxypropyl) ethylenediamine, 15 wt% Triton X-100) and incubated at 37°C  
544 shaking. Every other day CUBIC1 solution was exchanged until tissue appeared  
545 transparent (spinal cord ~ 4 days, DRG ~ 1-2 days). Afterwards, samples were washed  
546 for 1 day with PBS at RT, refractive index matched with EasyIndex (LifeCanvas  
547 Technologies) at 37°C and imaged with the ZEISS Light-sheet Z.1. For image analysis  
548 and video rendering Arivis Vision4D (Arivis AG) and Imaris (Oxford Instruments) was  
549 used.

550

### 551 *Retrograde labeling of proprioceptors and motor neurons*

552 For retrograde labelling of p1 proprioceptors, mice were anesthetized with  
553 isoflurane and a small incision on the skin was made to expose the muscle of interest.  
554 50 nl of a 1% solution of Alexa555-conjugated CTB (Life Technologies) was injected  
555 with a glass capillary into the desired muscles. Animals were sacrificed and perfused  
556 after 3 days. For retrograde labelling of e15.5 proprioceptors, embryos were dissected  
557 in ice-cold artificial cerebrospinal fluid and pinned down. Afterwards, skin from limb  
558 or back muscles was removed and 20% rhodamine dextran (Life Technologies) injected  
559 into the desired muscle using a pulled glass capillary. Afterwards, embryos were  
560 incubated in circulating oxygenated artificial cerebrospinal fluid (5% CO<sub>2</sub>, 95% O<sub>2</sub>)  
561 for 6 hours at 27°C and fixed with 4% PFA.

562

### 563 *Quantification and statistical analysis*

564 Details for statistical analysis and number of samples are indicated in figure  
565 legends. Significance for t-tests was defined as \*  $p < 0.05$ ; \*\*  $p < 0.01$ ; \*\*\*  $p < 0.001$ .  
566 Statistically analyses were performed using Prism - GraphPad v9.2.

567 **References**

- 568 Akay, T., Tourtellotte, W.G., Arber, S., and Jessell, T.M. (2014). Degradation  
569 of mouse locomotor pattern in the absence of proprioceptive sensory feedback. *Proc.*  
570 *Natl. Acad. Sci. U. S. A.* *111*, 16877–16882.
- 571 Balaskas, N., Ng, D., and Zampieri, N. (2020). The Positional Logic of Sensory-  
572 Motor Reflex Circuit Assembly. *Neuroscience* *450*, 142–150.
- 573 Banks, R.W., Hulliger, M., Saed, H.H., and Stacey, M.J. (2009). A comparative  
574 analysis of the encapsulated end-organs of mammalian skeletal muscles and of their  
575 sensory nerve endings. *J. Anat.* *214*, 859–887.
- 576 Bonanomi, D., Chivatakarn, O., Bai, G., Abdesselem, H., Lettieri, K.,  
577 Marquardt, T., Pierchala, B.A., and Pfaff, S.L. (2012). Ret Is a Multifunctional  
578 Coreceptor that Integrates Diffusible- and Contact-Axon Guidance Signals. *Cell* *148*,  
579 568–582.
- 580 Brink, E.E., and Pfaff, D.W. (1980). Vertebral Muscles of the Back and Tail of  
581 the Albino Rat (*Rattus norvegicus albinus*); pp. 1–23. *Brain. Behav. Evol.* *17*, 1–23.
- 582 Cavanaugh, D.J., Chesler, A.T., Jackson, A.C., Sigal, Y.M., Yamanaka, H.,  
583 Grant, R., O'Donnell, D., Nicoll, R. a, Shah, N.M., Julius, D., et al. (2011). *Trpv1*  
584 Reporter Mice Reveal Highly Restricted Brain Distribution and Functional Expression  
585 in Arteriolar Smooth Muscle Cells. *J. Neurosci.* *31*, 5067–5077.
- 586 Charles, J.P., Cappellari, O., Spence, A.J., Hutchinson, J.R., and Wells, D.J.  
587 (2016). Musculoskeletal Geometry, Muscle Architecture and Functional  
588 Specialisations of the Mouse Hindlimb. *PLoS One* *11*, e0147669.
- 589 Chen, A.I., De Nooij, J.C., and Jessell, T.M. (2006). Graded activity of  
590 transcription factor *Runx3* specifies the laminar termination pattern of sensory axons in  
591 the developing spinal cord. *Neuron* *49*, 395–408.

592           Chiu, I.M., Barrett, L.B., Williams, E.K., Strohlic, D.E., Lee, S., Weyer, A.D.,  
593 Lou, S., Bryman, G.S., Roberson, D.P., Ghasemlou, N., et al. (2014). Transcriptional  
594 profiling at whole population and single cell levels reveals somatosensory neuron  
595 molecular diversity. *Elife* 3, 1–32.

596           de Nooij, J.C., Doobar, S., and Jessell, T.M. (2013). Etv1 Inactivation Reveals  
597 Proprioceptor Subclasses that Reflect the Level of NT3 Expression in Muscle Targets.  
598 *Neuron* 77, 1055–1068.

599           Eccles, J.C., Eccles, R.M., and Lundberg, A. (1957). The convergence of  
600 monosynaptic excitatory afferents on to many different species of alpha motoneurons.  
601 *J. Physiol.* 137, 22–50.

602           Frisén, J., Yates, P.A., McLaughlin, T., Friedman, G.C., O’Leary, D.D., and  
603 Barbacid, M. (1998). Ephrin-A5 (AL-1/RAGS) Is Essential for Proper Retinal Axon  
604 Guidance and Topographic Mapping in the Mammalian Visual System. *Neuron* 20,  
605 235–243.

606           Gallarda, B.W., Bonanomi, D., Müller, D., Brown, A., Alaynick, W.A.,  
607 Andrews, S.E., Lemke, G., Pfaff, S.L., and Marquardt, T. (2008). Segregation of Axial  
608 Motor and Sensory Pathways via Heterotypic Trans-Axonal Signaling. *Science* (80-. ).  
609 320, 233–236.

610           Hashimshony, T., Senderovich, N., Avital, G., Klochender, A., de Leeuw, Y.,  
611 Anavy, L., Gennert, D., Li, S., Livak, K.J., Rozenblatt-Rosen, O., et al. (2016). CEL-  
612 Seq2: Sensitive highly-multiplexed single-cell RNA-Seq. *Genome Biol.* 17.

613           Helmbacher, F., Schneider-Maunoury, S., Topilko, P., Tiret, L., and Charnay,  
614 P. (2000). Targeting of the EphA4 tyrosine kinase receptor affects dorsal/ventral  
615 pathfinding of limb motor axons. *Development* 127, 3313–3324.



616 Hippenmeyer, S., Huber, R.M., Ladle, D.R., Murphy, K., and Arber, S. (2007).  
617 ETS Transcription Factor Erm Controls Subsynaptic Gene Expression in Skeletal  
618 Muscles. *Neuron* 55, 726–740.

619 Jessell, T.M. (2000). Neuronal specification in the spinal cord: inductive signals  
620 and transcriptional codes. *Nat. Rev. Genet.* 1, 20–29.

621 Kaiser, T., Ting, J.T., Monteiro, P., and Feng, G. (2016). Transgenic labeling of  
622 parvalbumin-expressing neurons with tdTomato. *Neuroscience* 321, 236–245.

623 Kania, A., and Jessell, T.M. (2003). Topographic motor projections in the limb  
624 imposed by LIM homeodomain protein regulation of ephrin-A:EphA interactions.  
625 *Neuron* 38, 581–596.

626 Kania, A., and Klein, R. (2016). Mechanisms of ephrin–Eph signalling in  
627 development, physiology and disease. *Nat. Rev. Mol. Cell Biol.* 17, 240–256.

628 Lallemand, F., and Ernfors, P. (2012). Molecular interactions underlying the  
629 specification of sensory neurons. *Trends Neurosci.* 35, 373–381.

630 Levanon, D., Bettoun, D., Harris-Cerruti, C., Woolf, E., Negreanu, V., Eilam,  
631 R., Bernstein, Y., Goldenberg, D., Xiao, C., Fliegau, M., et al. (2002). The Runx3  
632 transcription factor regulates development and survival of TrkC dorsal root ganglia  
633 neurons. *EMBO J.* 21, 3454–3463.

634 Madisen, L., Garner, A.R., Shimaoka, D., Chuong, A.S., Klapoetke, N.C., Li,  
635 L., van der Bourg, A., Niino, Y., Egolf, L., Monetti, C., et al. (2015). Transgenic mice  
636 for intersectional targeting of neural sensors and effectors with high specificity and  
637 performance. *Neuron* 85, 942–958.

638 Madisen, L., Zwingman, T.A., Sunkin, S.M., Oh, S.W., Zariwala, H.A., Gu, H.,  
639 Ng, L.L., Palmiter, R.D., Hawrylycz, M.J., Jones, A.R., et al. (2010). A robust and high-  
640 throughput Cre Repointing and characterization. *Nat Neurosci* 13, 133–140.

641 Marmigère, F., and Ernfors, P. (2007). Specification and connectivity of  
642 neuronal subtypes in the sensory lineage. *Nat. Rev. Neurosci.* 8, 114–127.

643 Mears, S.C., and Frank, E. (1997). Formation of specific monosynaptic  
644 connections between muscle spindle afferents and motoneurons in the mouse. *J.*  
645 *Neurosci.* 17, 3128–3135.

646 Meltzer, S., Santiago, C., Sharma, N., and Ginty, D.D. (2021). The cellular and  
647 molecular basis of somatosensory neuron development. *Neuron* 109, 3736–3757.

648 Mendelsohn, A.I., Simon, C.M., Abbott, L.F., Mentis, G.Z., and Jessell, T.M.  
649 (2015). Activity Regulates the Incidence of Heteronymous Sensory-Motor  
650 Connections. *Neuron* 87, 111–123.

651 Mendelson, B., and Frank, E. (1991). Specific monosynaptic sensory-motor  
652 connections form in the absence of patterned neural activity and motoneuronal cell  
653 death. *J. Neurosci.* 11, 1390–1403.

654 Mishra, S.K., Tisel, S.M., Orestes, P., Bhangoo, S.K., and Hoon, M.A. (2011).  
655 TRPV1-lineage neurons are required for thermal sensation. *EMBO J.* 30, 582–593.

656 Oliver, K.M., Florez-Paz, D.M., Badea, T.C., Mentis, G.Z., Menon, V., and de  
657 Nooij, J.C. (2021). Molecular correlates of muscle spindle and Golgi tendon organ  
658 afferents. *Nat. Commun.* 12, 1451.

659 Pearson, K.G. (2004). Generating the walking gait: role of sensory feed- back.  
660 *Prog. Brain Res.* 143, 123–129.

661 Philippidou, P., and Dasen, J.S. (2013). Hox genes: choreographers in neural  
662 development, architects of circuit organization. *Neuron* 80, 12–34.

663 Poliak, S., Norovich, A.L., Yamagata, M., Sanes, J.R., and Jessell, T.M. (2016).  
664 Muscle-type Identity of Proprioceptors Specified by Spatially Restricted Signals from  
665 Limb Mesenchyme. *Cell* 164, 512–525.

666           Proske, U., and Gandevia, S.C. (2012). The Proprioceptive Senses: Their Roles  
667   in Signaling Body Shape, Body Position and Movement, and Muscle Force. *Physiol.*  
668   *Rev.* *92*, 1651–1697.

669           Sharma, N., Flaherty, K., Lezgiyeva, K., Wagner, D.E., Klein, A.M., and Ginty,  
670   D.D. (2020). The emergence of transcriptional identity in somatosensory neurons.  
671   *Nature* *577*, 392–398.

672           Shin, M.M., Catela, C., and Dasen, J. (2020). Intrinsic control of neuronal  
673   diversity and synaptic specificity in a proprioceptive circuit. *Elife* *9*, 1–27.

674           Susaki, E.A., Tainaka, K., Perrin, D., Yukinaga, H., Kuno, A., and Ueda, H.R.  
675   (2015). Advanced CUBIC protocols for whole-brain and whole-body clearing and  
676   imaging. *Nat. Protoc.* *10*, 1709–1727.

677           Tourtellotte, W.G., and Milbrandt, J. (1998). Sensory ataxia and muscle spindle  
678   agenesis in mice lacking the transcription factor *Egr3*. *Nat. Genet.* *20*, 87–91.

679           Tuthill, J.C., and Azim, E. (2018). Proprioception. *Curr. Biol.* *28*, R194–R203.

680           Usoskin, D., Furlan, A., Islam, S., Abdo, H., Lönnerberg, P., Lou, D., Hjerling-  
681   Leffler, J., Haeggström, J., Kharchenko, O., Kharchenko, P. V., et al. (2015). Unbiased  
682   classification of sensory neuron types by large-scale single-cell RNA sequencing. *Nat.*  
683   *Neurosci.* *18*, 145–153.

684           Wang, L., Klein, R., Zheng, B., and Marquardt, T. (2011). Anatomical Coupling  
685   of Sensory and Motor Nerve Trajectory via Axon Tracking. *Neuron* *71*, 263–277.

686           Windhorst, U. (2007). Muscle proprioceptive feedback and spinal networks.  
687   *Brain Res. Bull.* *73*, 155–202.

688           Woo, S.H., Lukacs, V., De Nooij, J.C., Zaytseva, D., Criddle, C.R., Francisco,  
689   A., Jessell, T.M., Wilkinson, K.A., and Patapoutian, A. (2015). *Piezo2* is the principal  
690   mechanotransduction channel for proprioception. *Nat. Neurosci.* *18*, 1756–1762.

691 Wu, D., Schieren, I., Qian, Y., Zhang, C., Jessell, T.M., and de Nooij, J.C.  
692 (2019). A Role for Sensory end Organ-Derived Signals in Regulating Muscle Spindle  
693 Proprioceptor Phenotype. *J. Neurosci.* *39*, 4252–4267.

694 Wu, H., Petitpré, C., Fontanet, P., Sharma, A., Bellardita, C., Quadros, R.M.,  
695 Jannig, P.R., Wang, Y., Heimel, J.A., Cheung, K.K.Y., et al. (2021). Distinct subtypes  
696 of proprioceptive dorsal root ganglion neurons regulate adaptive proprioception in  
697 mice. *Nat. Commun.* 1–13.

698 Zampieri, N., and de Nooij, J.C. (2021). Regulating muscle spindle and Golgi  
699 tendon organ proprioceptor phenotypes. *Curr. Opin. Physiol.* *19*, 204–210.

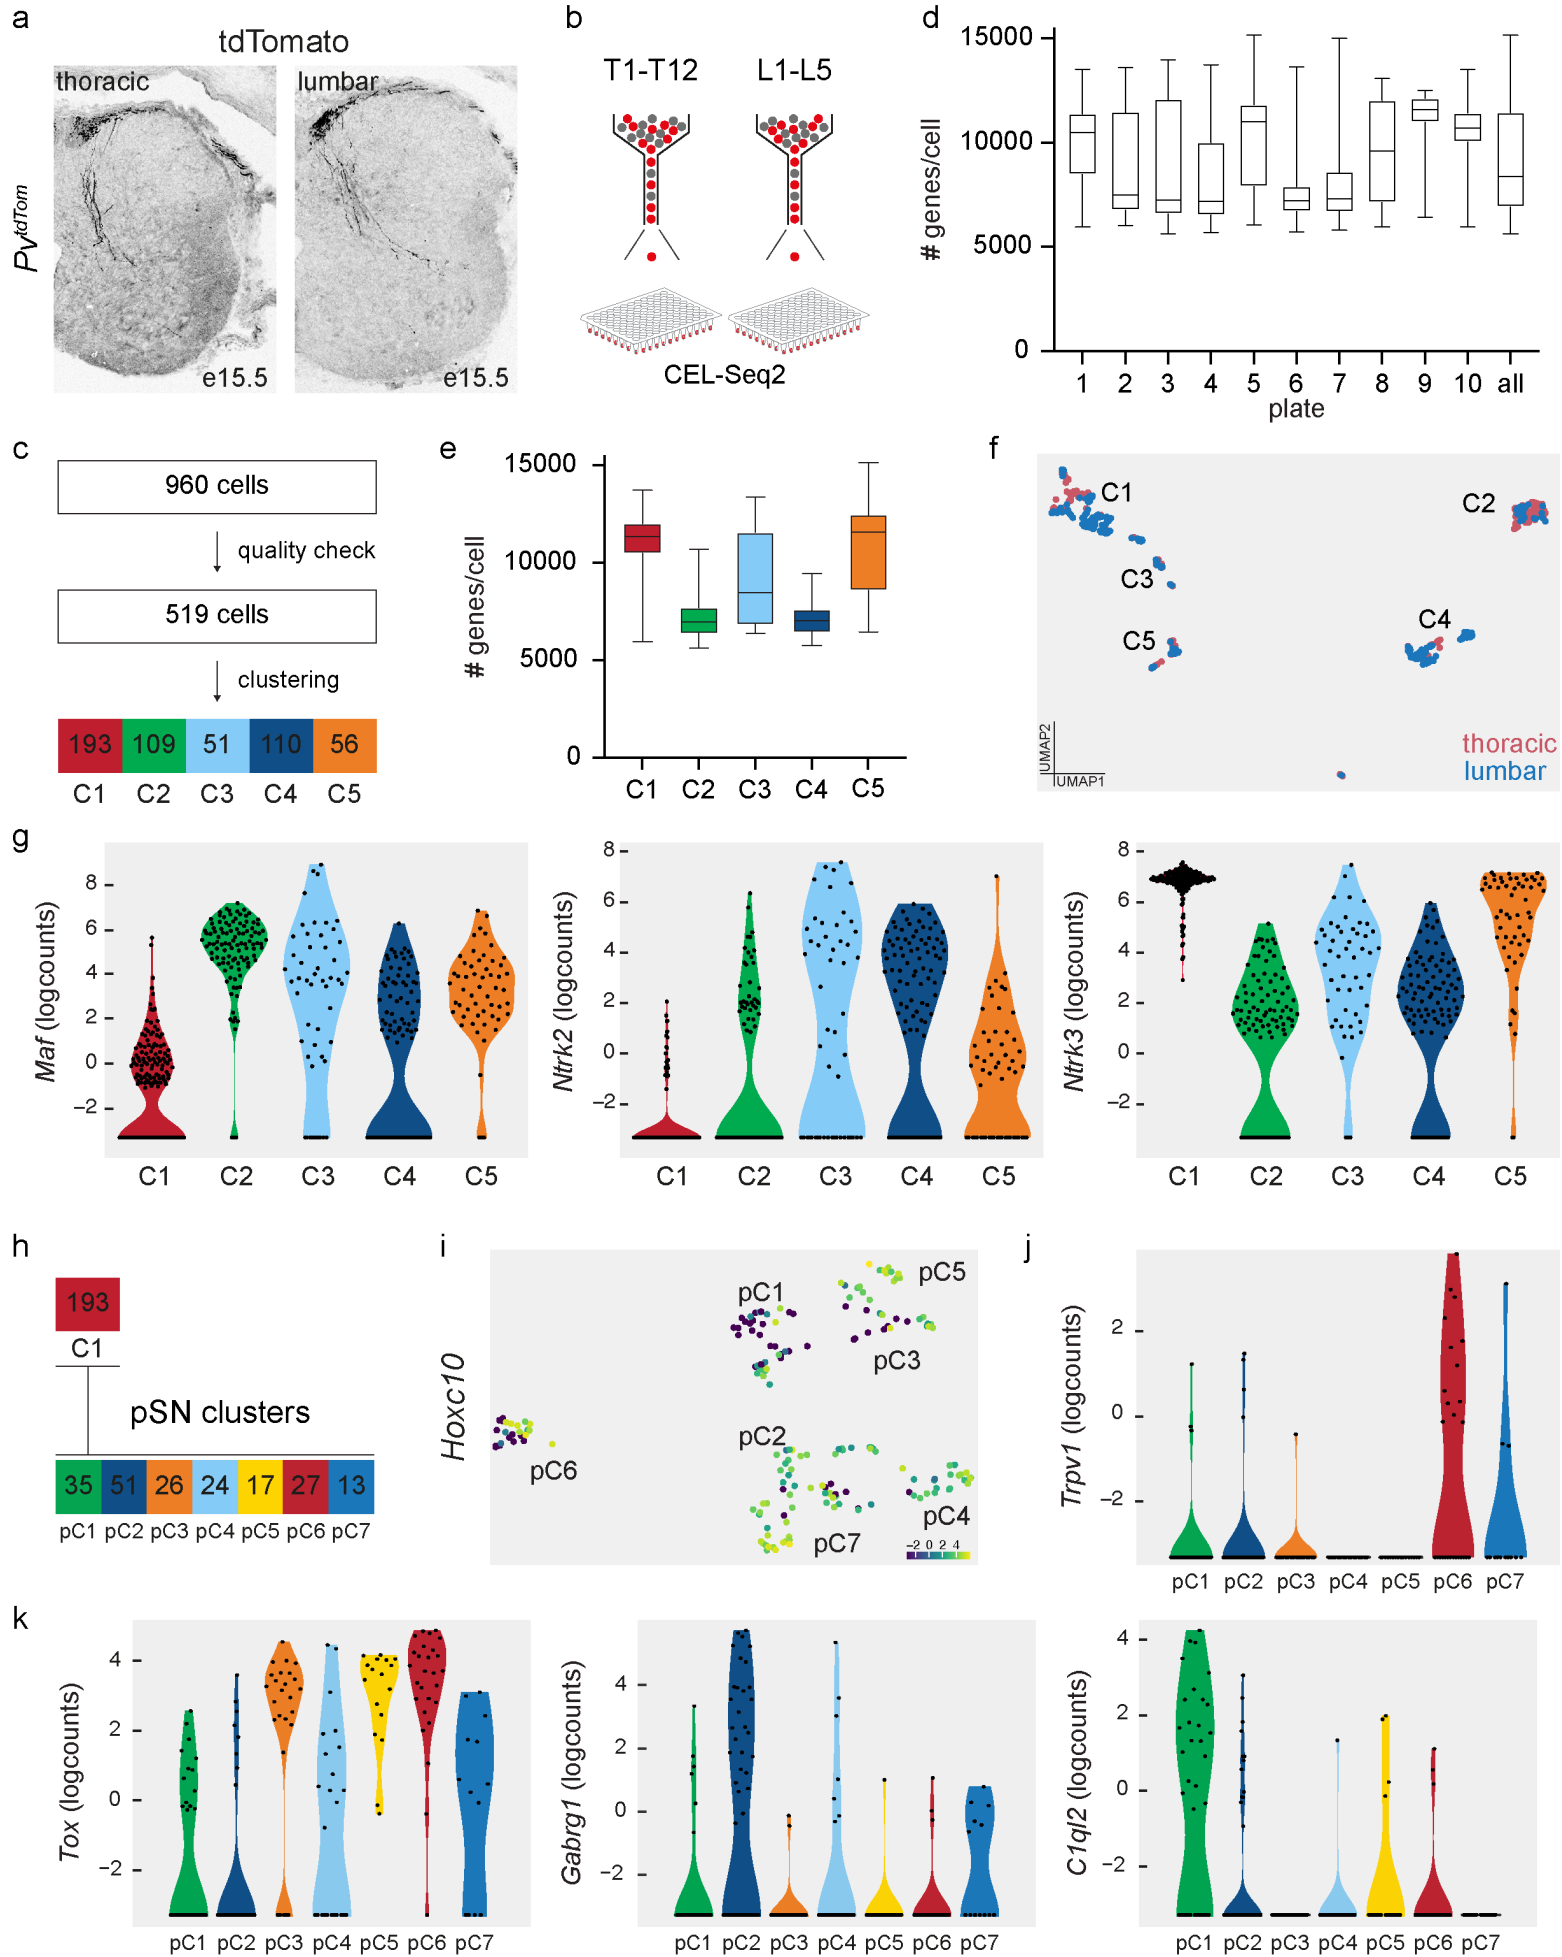

**Extended Data Fig. 1. scRNA-seq analysis of e15.5 proprioceptors.** **a)** Representative images of tdTomato<sup>+</sup> afferents in thoracic and lumbar spinal cord from e15.5 *Pv<sup>tdTom</sup>* mice. **b)** Schematic representation of the single cell sorting strategy for sensory neurons dissociated from thoracic and lumbar DRG of e15.5 *Pv<sup>tdTom</sup>* mice. **c)** Number of e15.5 *Pv<sup>tdTom</sup>* DRG neurons sorted, analyzed after quality control and assigned to each cluster after bioinformatic analysis. **d)** Boxplots representing the number of genes per cells found in each 96 well plate (#1 to #10) and on average in all plates (“all”). **e)** Boxplots representing the number of genes per cells found in each cluster. **f)** UMAP visualization of proprioceptor clusters color coded according to thoracic (red) and lumbar (blue) origin of the cells. **g)** Violin plots showing expression (logcounts) of *Maf*, *Ntrk2*, and *Ntrk3* in clusters C1-C5. **h)** Number of C1 neurons re-clustered and assigned to proprioceptive clusters (pC) 1-7. **i)** UMAP visualization of *Hoxc10* expression (logcounts) in proprioceptor clusters. **j)** Violin plots showing expression (logcounts) of *Trpv1* in proprioceptor clusters pC1-pC7. **k)** Violin plots showing expression (logcounts) of *Tox*, *Gabrg1*, and *C1ql2* in proprioceptor clusters pC1-pC7.

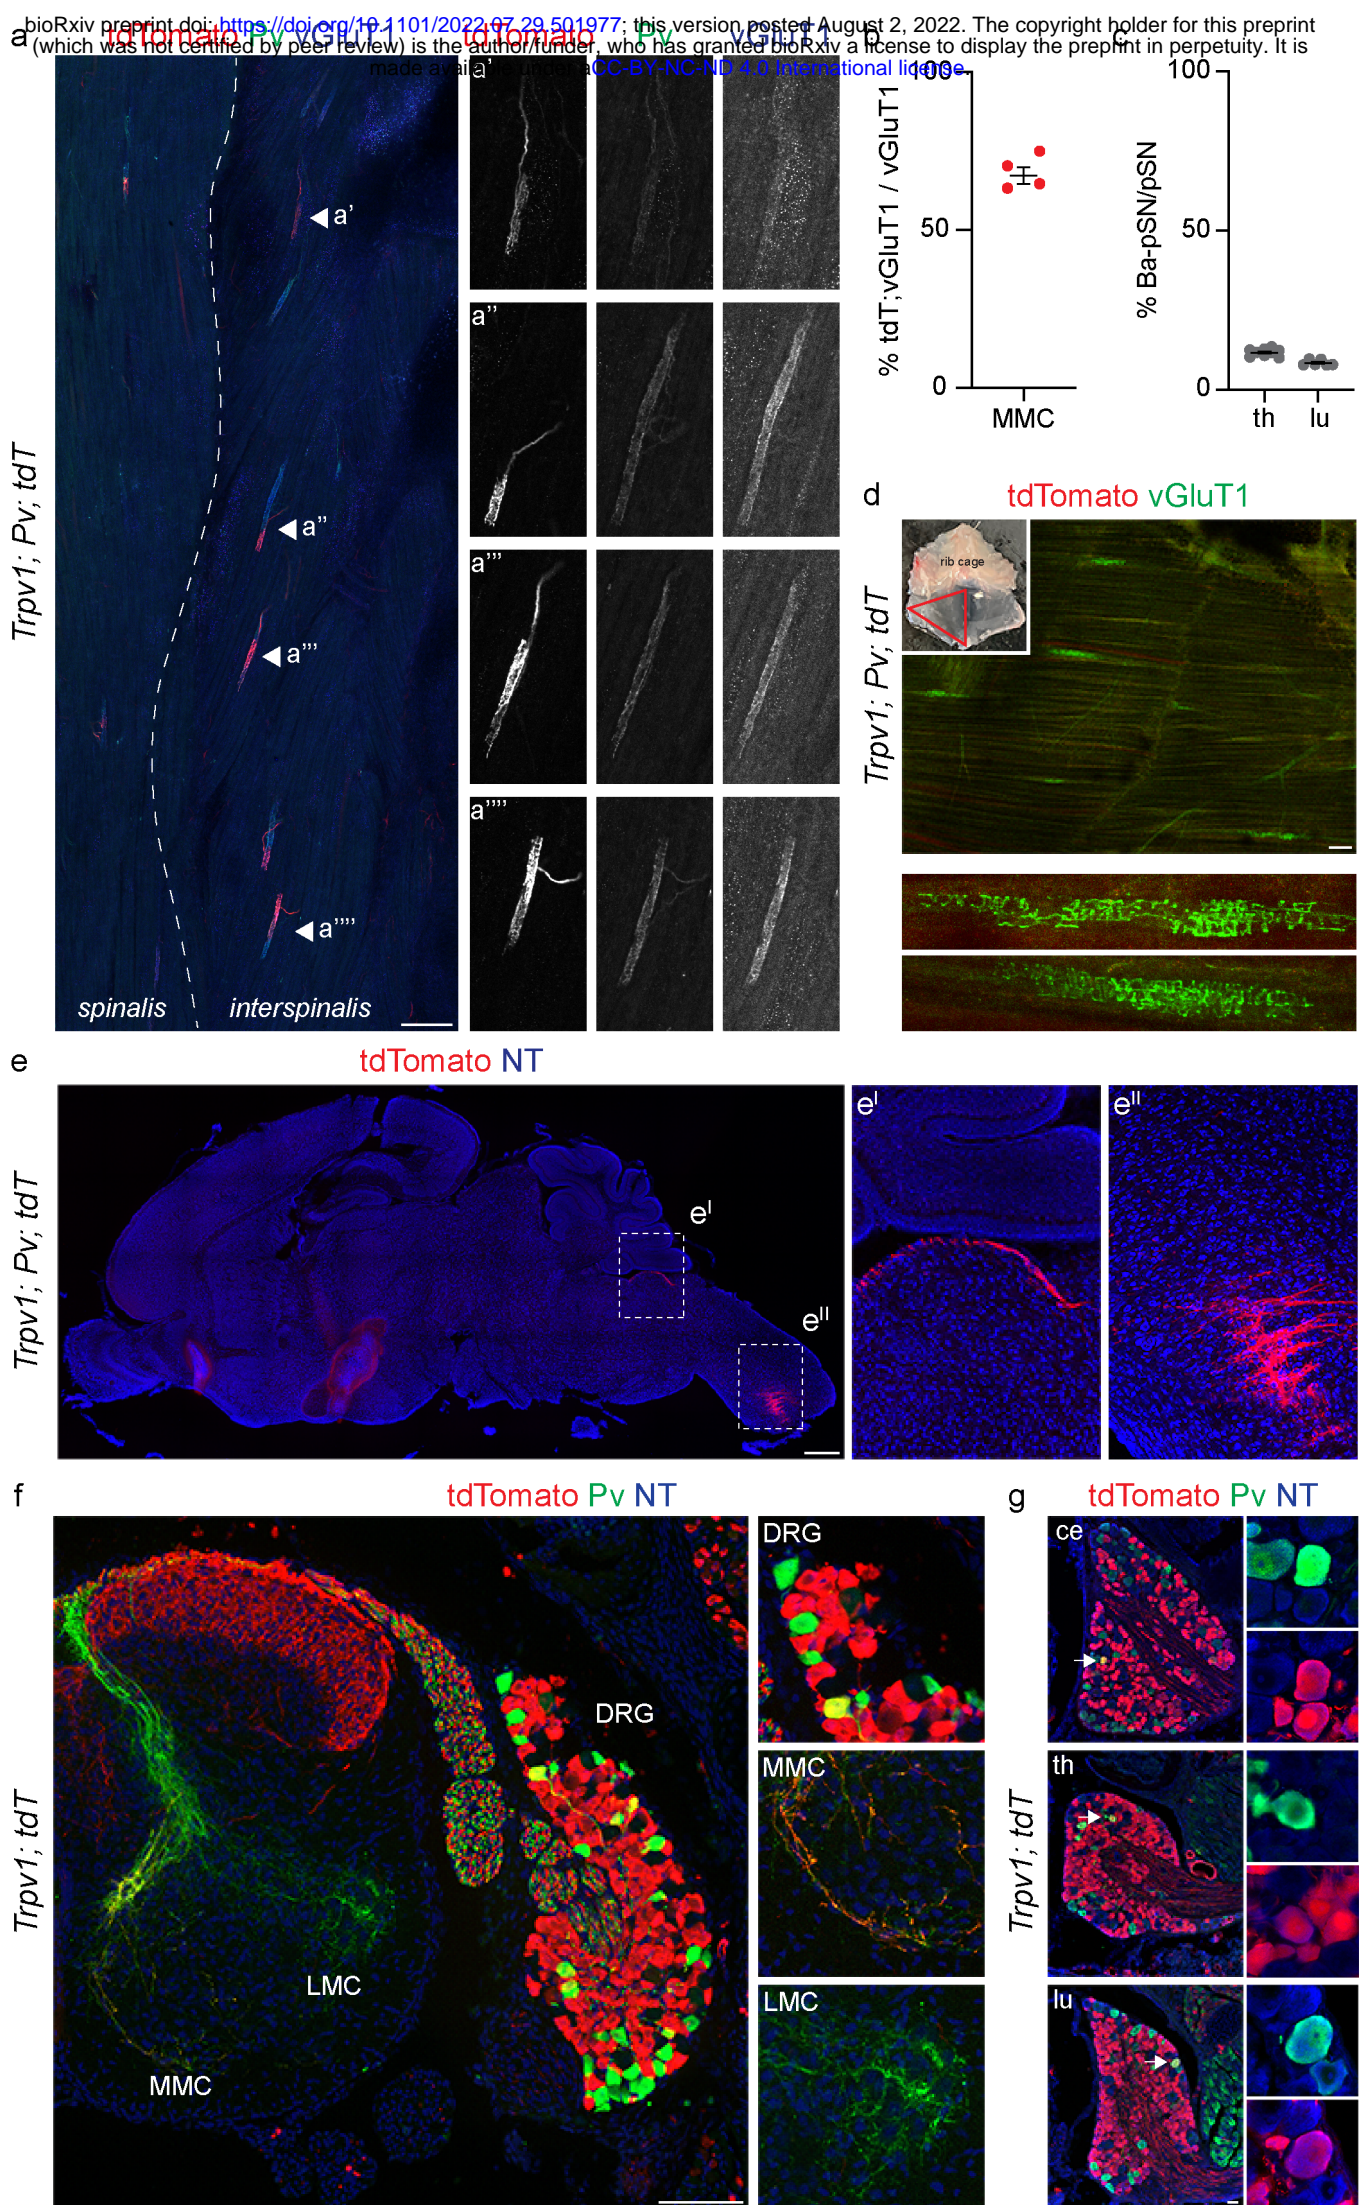

**Extended Data Fig. 2. Genetic labelling of *Trpv1*<sup>+</sup> proprioceptors.** **a)** Representative images of vGluT1<sup>+</sup>; Pv<sup>+</sup>; tdTomato<sup>-</sup> spindles in the back (spinalis and interspinalis) muscles of p7 *Trpv1*<sup>Cre</sup>; *Pv*<sup>Flp</sup>; *Ai65* mice. Scale bar: 100 μm. **b)** Percentage of tdTomato<sup>+</sup>; vGluT1<sup>+</sup> boutons juxtaposed to ChAT<sup>+</sup> MMC neurons in p7 *Trpv1*<sup>Cre</sup>; *Pv*<sup>Flp</sup>; *Ai65* mice (n = 4 animals, 70 muscle spindles, mean ± SEM). **c)** Percentage of proprioceptors labelled in p7 *Trpv1*<sup>Cre</sup>; *Pv*<sup>Flp</sup>; *Ai65* mice at thoracic and lumbar levels. **d)** Representative image of vGluT1<sup>+</sup>; tdTomato<sup>-</sup> spindles in the abdominal muscles of p7 *Trpv1*<sup>Cre</sup>; *Pv*<sup>Flp</sup>; *Ai65* mice. Scale bar: 100 μm. **e)** Representative sagittal brain section showing labelling of tdTomato<sup>+</sup> proprioceptive afferents in the brainstem (e<sup>I</sup>) and cervical spinal cord (e<sup>II</sup>) of p7 *Trpv1*<sup>Cre</sup>; *Pv*<sup>Flp</sup>; *Ai65* mice. Scale bar: 500 μm. **f)** Representative image of sensory neurons labelled in a p7 *Trpv1*<sup>Cre</sup>; *Ai14* mice at lumbar level and high magnifications of DRG, MMC and LMC areas. Scale bar: 100 μm. **g)** Representative images of cervical (ce), thoracic (th), and lumbar (lu) DRG sections showing tdTomato<sup>+</sup>; Pv<sup>+</sup> sensory neurons in p7 *Trpv1*<sup>Cre</sup>; *Ai14* mice. Scale bar: 25 μm.



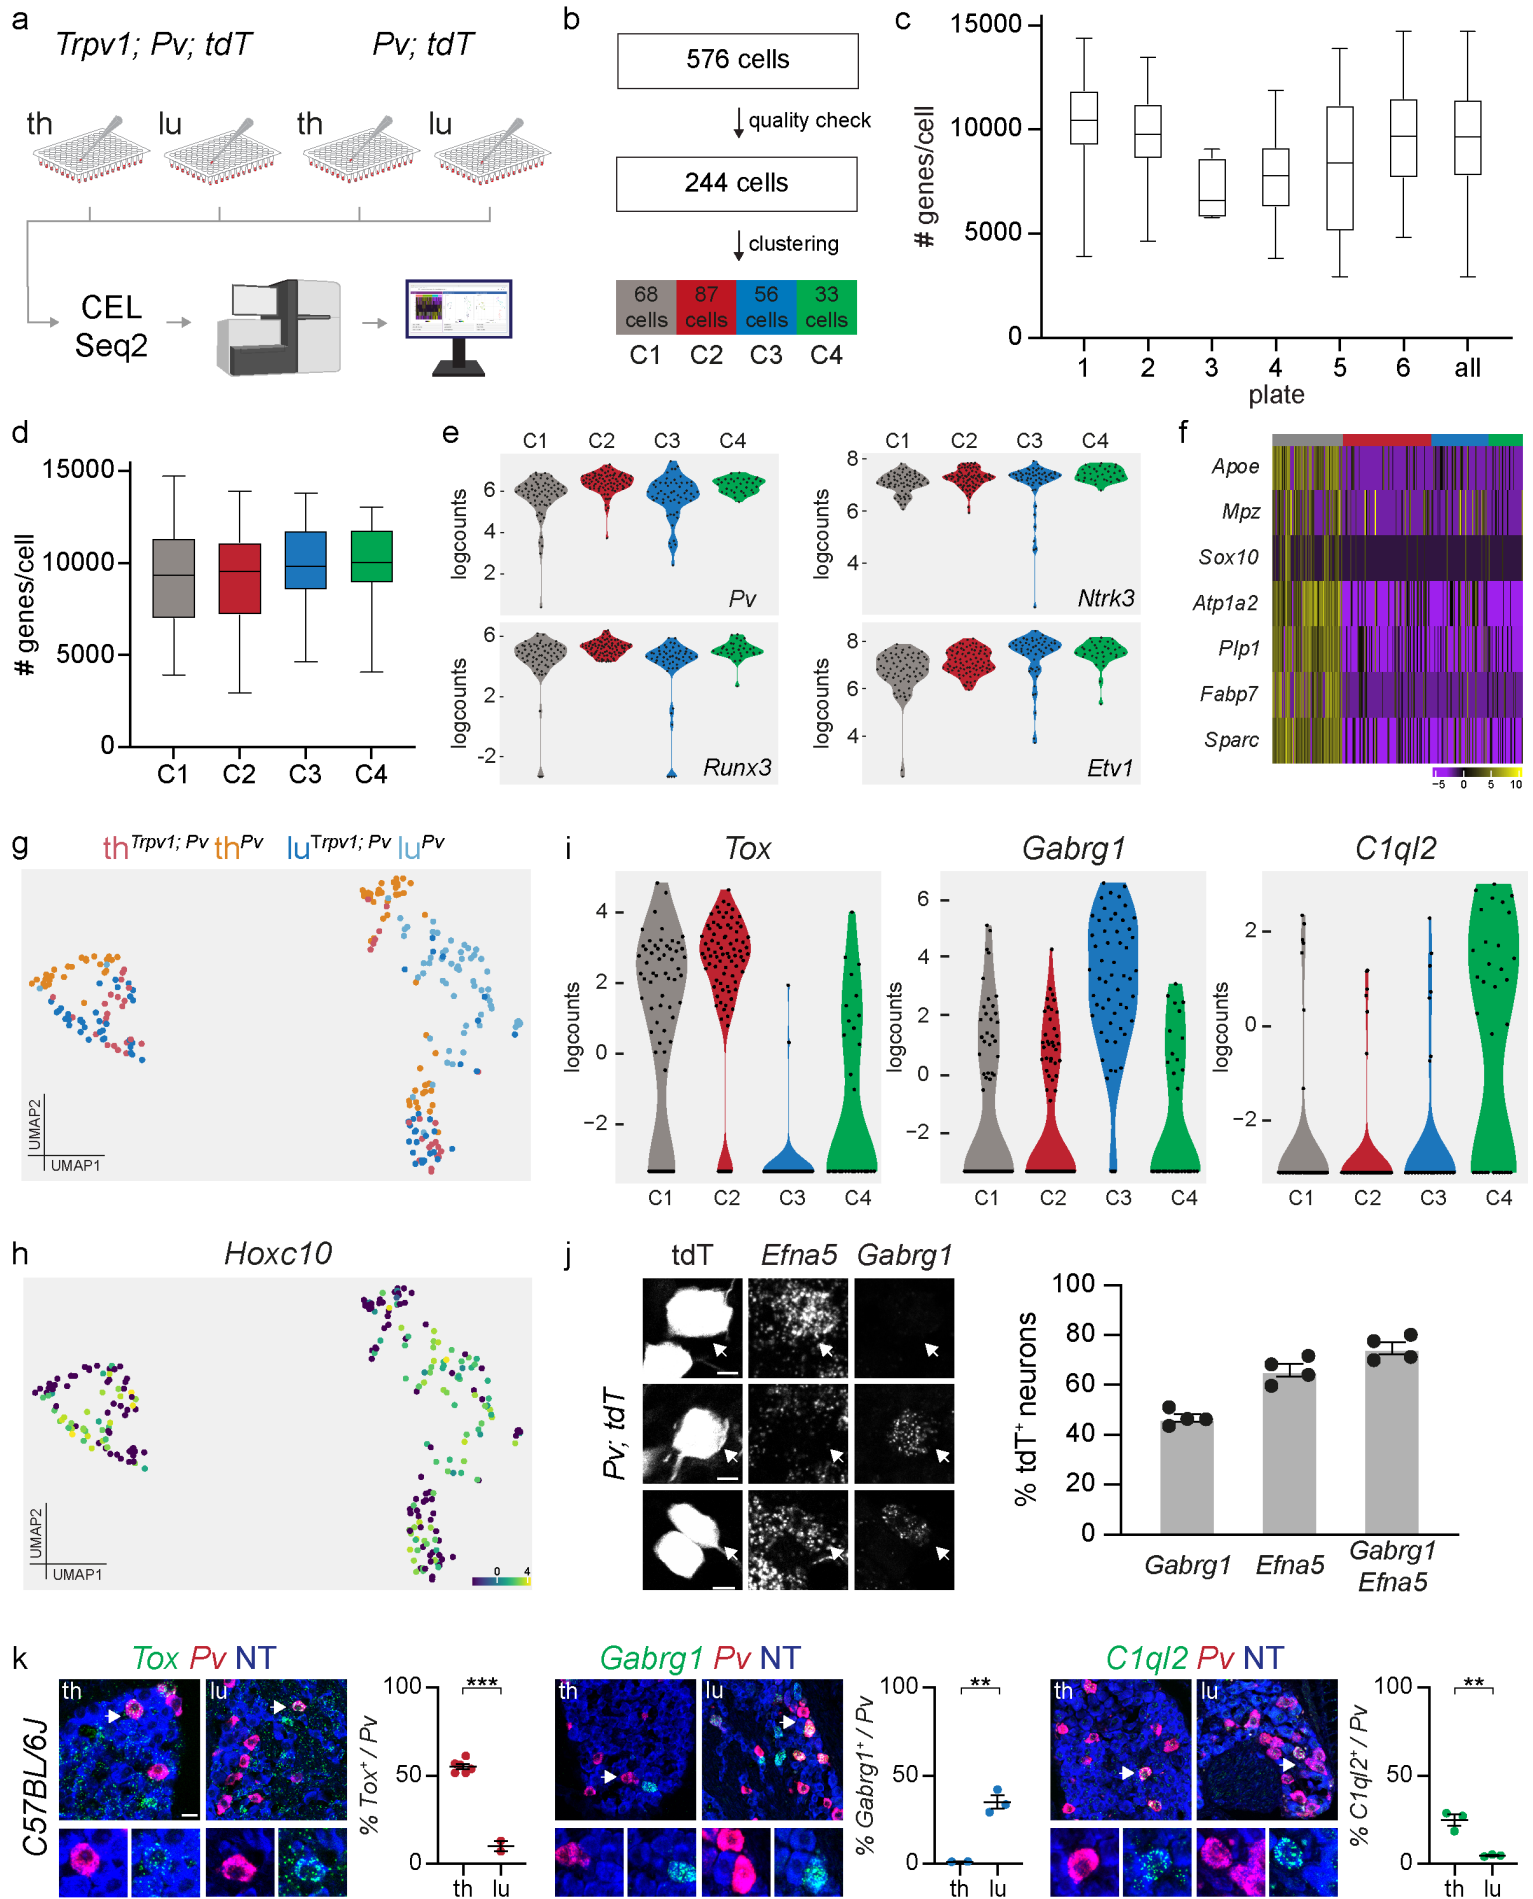

**Extended Data Fig. 3. Transcriptome analysis at p1 and validation of proprioceptor muscle subtypes.** **a)** Schematic representation of the single cell sorting strategy for neurons dissociated from p1 thoracic and lumbar DRG of *Trpv1<sup>Cre</sup>; Pv<sup>Flp</sup>; Ai65* and *Pv<sup>Cre</sup>; Ai14* mice. **b)** Number of tdTomato<sup>+</sup> DRG neurons sorted, analyzed after quality control and assigned to each cluster after bioinformatic analysis. **c)** Boxplots representing the number of genes per cells found in each 96 well plate (#1 to #6) and on average (“all”). **d)** Boxplots representing the number of genes per cells found in each cluster. **e)** Violin plots showing expression (logcounts) of general proprioceptor markers (*Pv*, *Ntrk3*, *Runx3*, *Etv1*) at p1. **f)** Heatmap showing expression (logcounts) of glial cell markers in proprioceptor clusters at p1. **g)** UMAP visualization of clusters color coded to represent thoracic and lumbar origin of cells sorted from *Trpv1<sup>Cre</sup>; Pv<sup>Flp</sup>; Ai65* and *Pv<sup>Cre</sup>; Ai14* mice. **h)** UMAP visualization of *Hoxc10* expression (logcounts) in proprioceptor clusters at p1. **i)** Violin plots showing expression (logcounts) of *Tox*, *Gabrg*, and *Clql2* in proprioceptor clusters at p1. **j)** Representative smFISH images of *Gabrg1* (C3) and *Efna5* (C3) expression in tdTomato<sup>+</sup> lumbar DRG neurons of p1 *Pv<sup>Cre</sup>; Ai14* mice (left) and quantification of percentage of tdTomato<sup>+</sup> sensory neurons expressing each marker alone or in combination (right). **k)** Representative smFISH images and quantification of *Tox* (C2), *Gabrg1* (C3), and *Clql2* (C4) expression in Pv<sup>+</sup> thoracic and lumbar DRG neurons of p1 wild type mice (each point represents one animal, mean ± SEM, T-test, \*\* p < 0.01, \*\*\* p < 0.001. Scale bar: 25 μm.

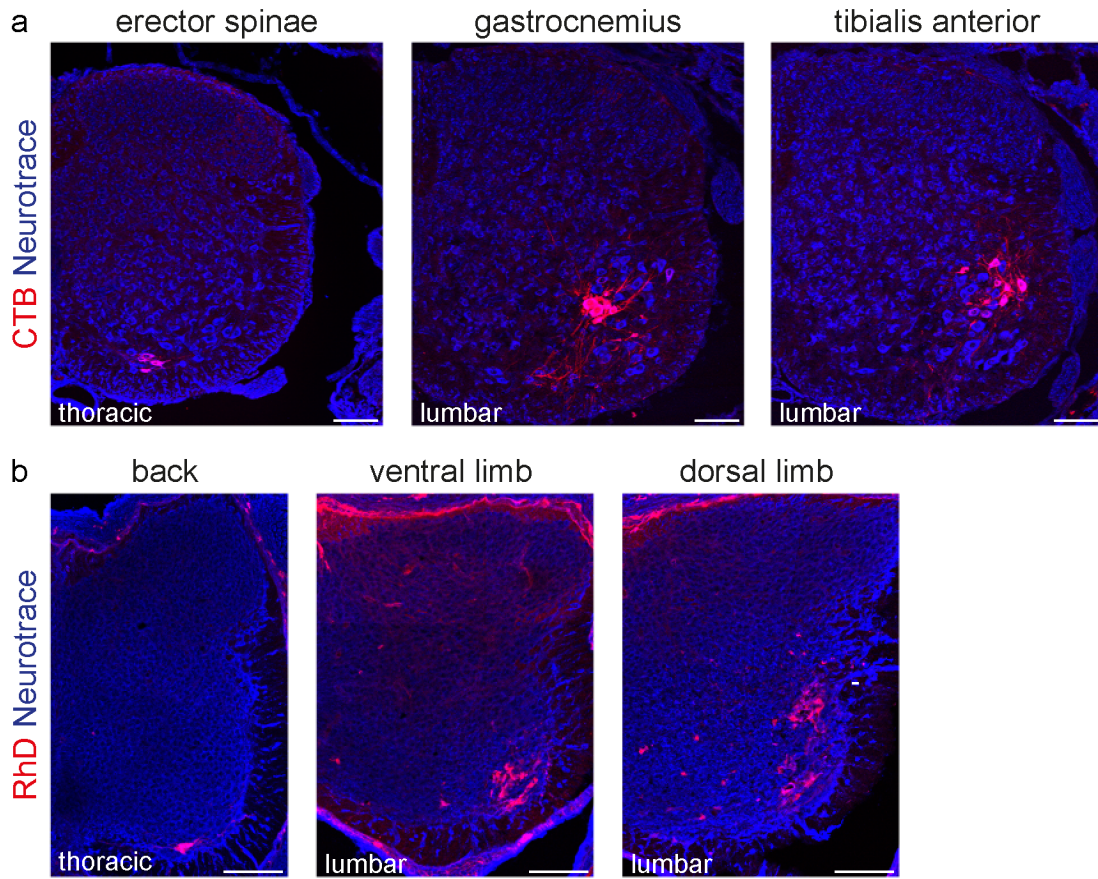

706

**Extended Data Fig. 4. Retrograde labeling of epaxial and limb innervating motor neurons. a)** Representative images of motor neurons retrogradely labelled after CTB injection in back (erector spinae) and hindlimb (gastrocnemius and tibialis anterior) muscles of wild-type mice. Scale bar: 100  $\mu$ m. **b)** Representative images of motor neurons retrogradely labelled after RhD injection in epaxial (back muscles) and ventral and dorsal hindlimb muscles of e15.5 wild-type embryos. Scale bar: 100  $\mu$ m.

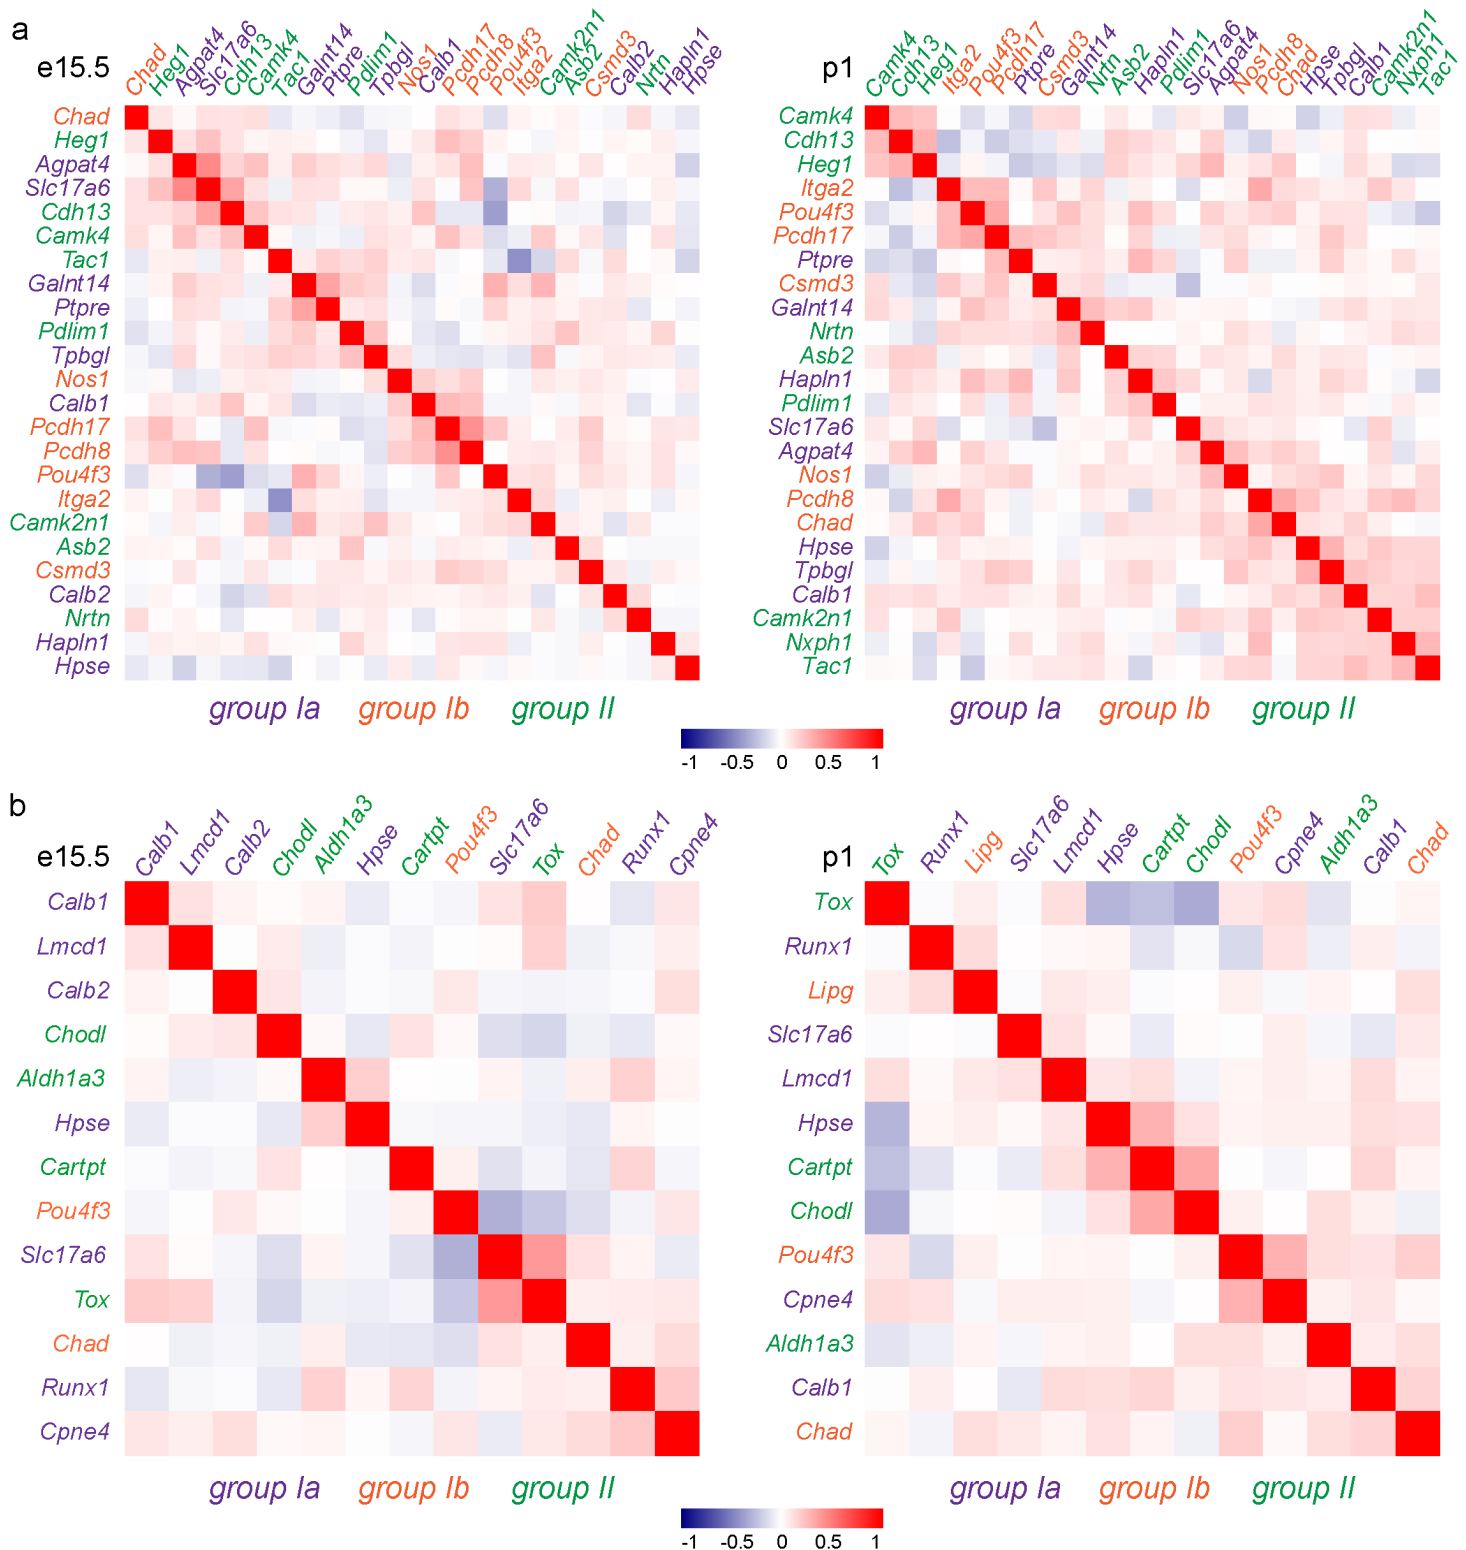

707

**Extended Data Fig. 5. Signatures for “receptor-type” proprioceptors start emerging at p1. a)** Heatmaps representing pairwise gene expression correlation values for group Ia (blue), group II (green), and group Ib (red) molecular signatures identified in *Oliver et al., 2021* at e15.5 (left) and p1 (right; Pearson’s  $r$  using logcounts). **b)** Heatmaps representing pairwise gene expression correlation values for group Ia (blue), group II (green), and group Ib (red) molecular signatures identified in *Wu et al., 2021* at e15.5 (left) and p1 (right; Pearson’s  $r$  using logcounts).

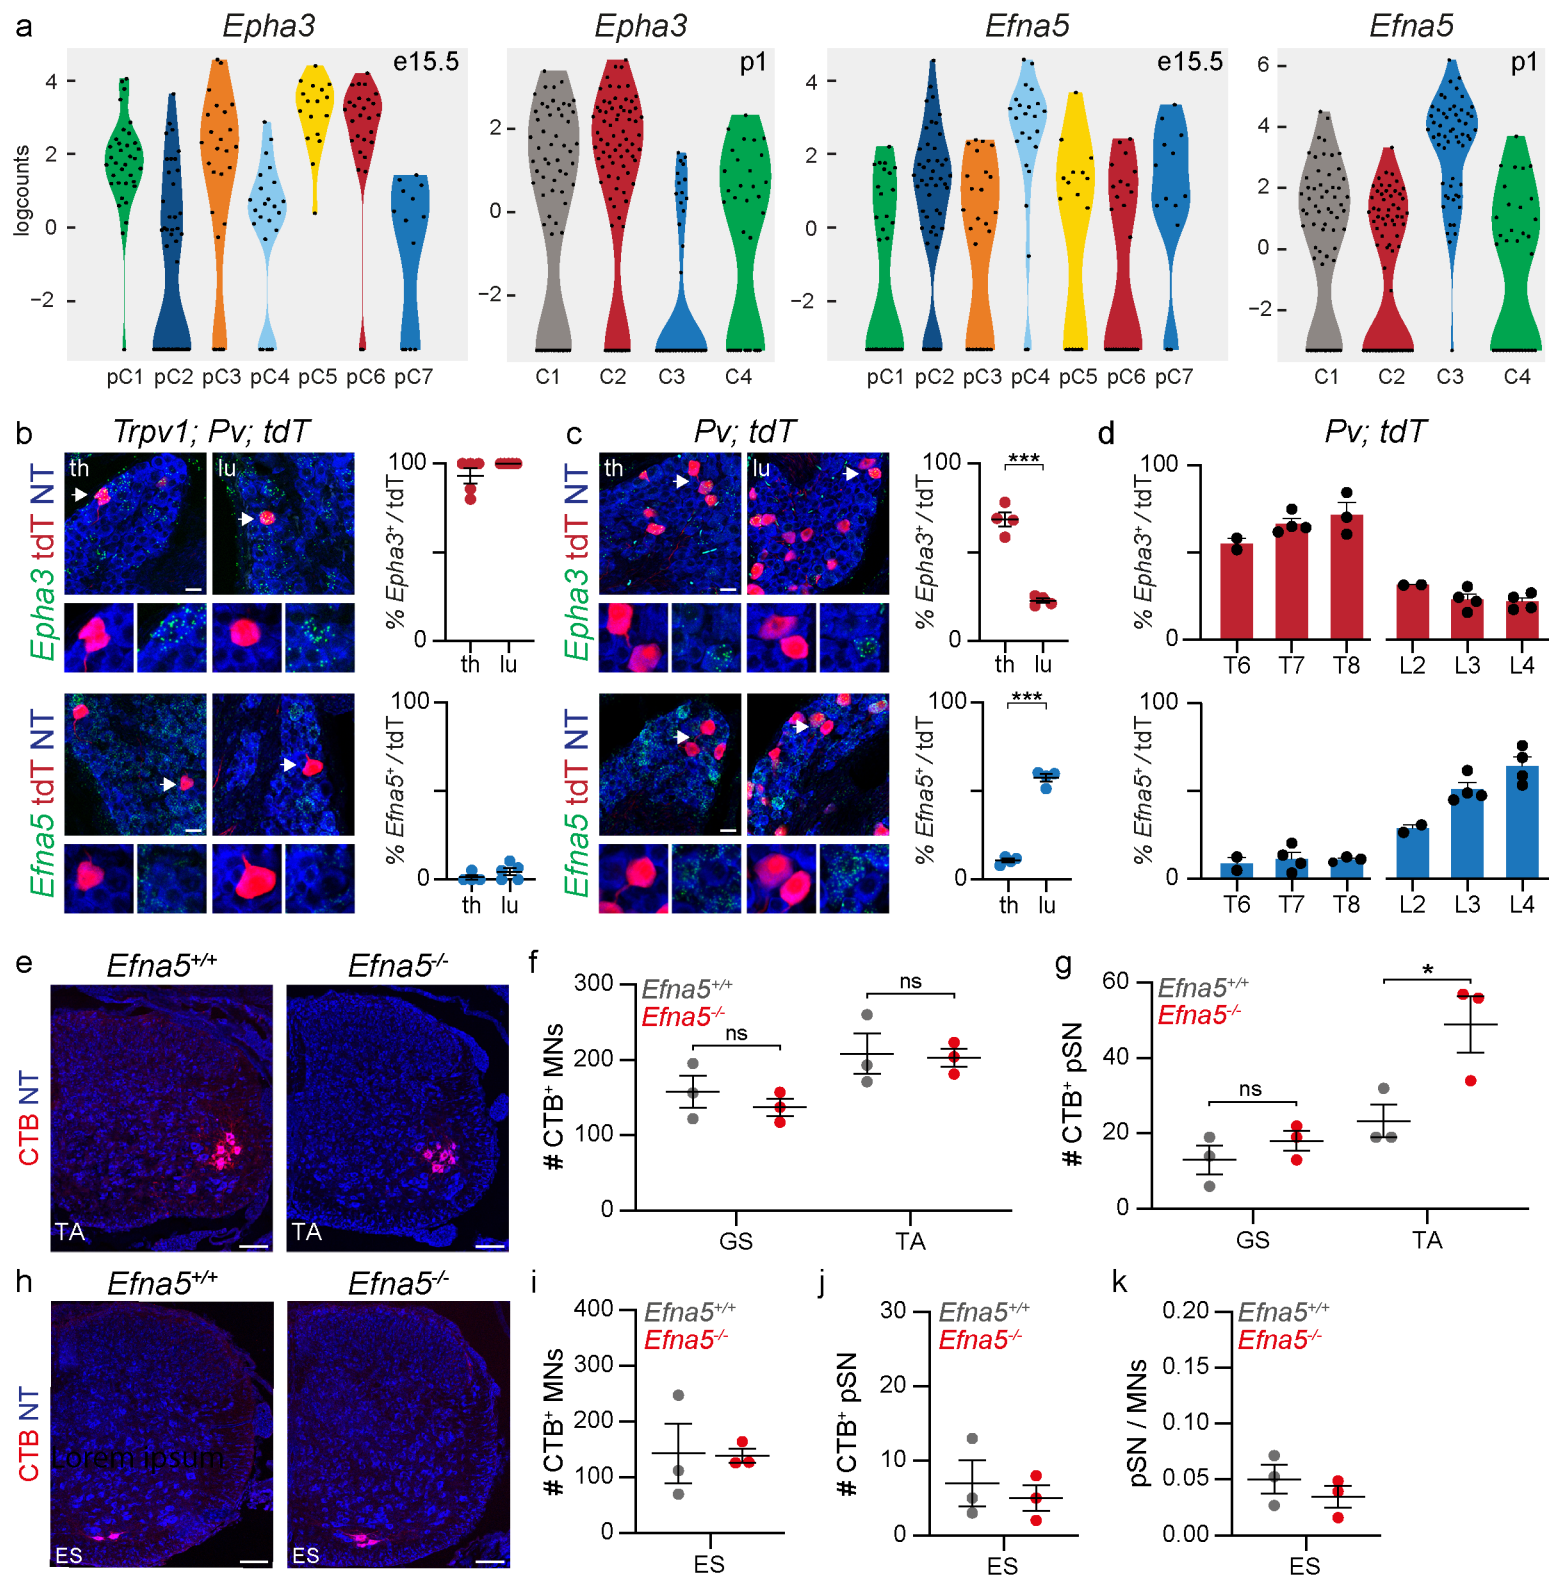

711  
712  
713  
714  
715  
716  
717  
718

**Extended Data Fig. 6. *Epha3* and *Efna5* expression defines proprioceptor muscle subtypes.** **a)** Violin plots showing expression (logcounts) of *Epha3* and *Efna5* in proprioceptor clusters at e15.5 and p1. **b)** Representative smFISH images and quantification of *Epha3* (top, C2) and *Efna5* (bottom, C3) expression in tdTomato<sup>+</sup> thoracic and lumbar DRG neurons of p1 *Trpv1<sup>Cre</sup>; Pv<sup>Flp</sup>; Ai65* mice (each point represents one animal, mean ± SEM). Scale bar: 25 μm. **c)** Representative smFISH images and quantification of *Epha3* (top, C2) and *Efna5* (bottom, C3) expression in tdTomato<sup>+</sup> thoracic and lumbar DRG neurons of p1 *Pv<sup>Cre</sup>; Ai14* mice (each point represents one animal, mean ± SEM, t-test, \*\*\* p < 0.001). Scale bar: 25 μm. **d)** Distribution of *Epha3* (C2) and *Efna5* (C3) in tdTomato<sup>+</sup> neurons from thoracic and lumbar DRG of p1 *Pv<sup>Cre</sup>; Ai14* mice (each point represents one animal, mean ± SEM). **e)** Representative images of motor neurons retrogradely labelled after CTB injection in the tibialis anterior (TA) muscle of p1 *Efna5<sup>+/+</sup>* and *Efna5<sup>-/-</sup>* mice. Scale bar: 100 μm. **f)** Number of motor neurons labelled after CTB injection in the gastrocnemius (GS) and tibialis anterior (TA) muscles of p1 *Efna5<sup>+/+</sup>* (gray) and *Efna5<sup>-/-</sup>* (red) mice (each point represents one animal, mean ± SEM, t-test, ns p > 0.05). **g)** Number of proprioceptors (*Pv<sup>+</sup>*) labelled after CTB injection in the gastrocnemius (GS) and tibialis anterior (TA) muscles of p1 *Efna5<sup>+/+</sup>* (gray) and *Efna5<sup>-/-</sup>* (red) mice (each point represents one animal, mean ± SEM, t-test, ns p > 0.05, \* p < 0.05). **h)** Representative images of motor neurons retrogradely labelled after CTB injection in the erector spinae (ES) muscle of p1 *Efna5<sup>+/+</sup>* and *Efna5<sup>-/-</sup>* mice. Scale bar: 100 μm. **i)** Number of motor neurons labelled after CTB injection in the erector spinae (ES) muscle of p1 *Efna5<sup>+/+</sup>* (gray) and *Efna5<sup>-/-</sup>* (red) mice (each point represents one animal, mean ± SEM, t-test, ns p > 0.05). **j)** Number of proprioceptors (*Pv<sup>+</sup>*) labelled after CTB injection in the erector spinae (ES) muscle of p1 *Efna5<sup>+/+</sup>* (gray) and *Efna5<sup>-/-</sup>* (red) mice (each point represents one animal, mean ± SEM, t-test, ns p > 0.05). **k)** Ratio of proprioceptor (*Pv<sup>+</sup>*) per motor neuron labelled after CTB injection in the erector spinae (ES) muscle muscles of p1 *Efna5<sup>+/+</sup>* (gray) and *Efna5<sup>-/-</sup>* (red) mice (each point represents one animal, mean ± SEM, t-test, ns p > 0.05).
